# Supplementary material
Source: Royal Society of Chemistry journal article supplement (doi:10.1039/d6ob00464d)
Supplement: d6ob00464d1.pdf [file d6ob00464d1.pdf]

# Copper-Catalyzed Xanthine–Chalcogenide Hybrids: Synthesis, DNA Binding & Docking

Clara Holthausen,<sup>a†</sup> Isabella Barbosa dos Reis Carlos,<sup>b†</sup> Suzane Quintana Gomes,<sup>a†</sup> Isis Juliane Arantes Granja,<sup>b,c</sup> Suelen Santos da Silva,<sup>a</sup> Angelica Ceci da Silva,<sup>d</sup> Eduardo Junca,<sup>e</sup> Matheus Vinícius Gregory Zimmermann,<sup>e</sup> Ismael Raitz,<sup>a</sup> Leonardo Bruno Federico,<sup>f</sup> Antonio Luiz Braga,<sup>d</sup> Jamal Rafique,<sup>b,c\*</sup> Sumbal Saba,<sup>b,\*</sup> Tiago Elias Allievi Frizon<sup>a,d\*</sup>

- a. Departamento de Energia e Sustentabilidade, Universidade Federal de Santa Catarina – UFSC, Rua Pedro João Pereira, 150, 88905-120, Araranguá – Santa Catarina, Brazil. E-mail: [tiago.frizon@ufsc.br](mailto:tiago.frizon@ufsc.br)*
- b. Laboratory of Sustainable Synthesis and Organochalcogen (LabSO), Instituto de Química (IQ), Universidade Federal de Goiás – UFG, 74690-900, Goiânia – Goiás, Brazil. E-mail: [sumbalsaba@ufg.br](mailto:sumbalsaba@ufg.br)*
- c. Instituto de Química (INQUI), Universidade Federal de Mato Grosso do Sul – UFMS, Avenida Senador Filinto Müller, 1555, 79074-460, Campo Grande - Mato Grosso do Sul, Brazil. E-mail: [jamal.rafique@ufms.br](mailto:jamal.rafique@ufms.br) , [jamal.chm@gmail.com](mailto:jamal.chm@gmail.com)*
- d. LabSelen, Departamento de Química, Universidade Federal de Santa Catarina – UFSC, Campus Universitário Trindade, Cep: 88035-972, Florianópolis – Santa Catarina, Brazil*
- e. Programa de Pós-graduação em Ciência e Engenharia de Materiais, Universidade do Extremo Sul Catarinense – UDESC, Av. Universitária, 1105, 88806-000, Criciúma – Santa Catarina, Brazil*
- f. Laboratório de Química Farmacêutica Medicinal - Departamento de Ciências Farmacêuticas - Universidade Federal de Santa Catarina – UFSC, Campus Universitário Trindade, Cep: 88035-972, Florianópolis – Santa Catarina, Brazil.*

† These authors contributed equally to this work.

\* corresponding author email: [jamal.rafique@ufms.br](mailto:jamal.rafique@ufms.br) , [jamal.chm@gmail.com](mailto:jamal.chm@gmail.com) (J.R.); [sumbalsaba@ufg.br](mailto:sumbalsaba@ufg.br) (S.S.); [tiago.frizon@ufsc.br](mailto:tiago.frizon@ufsc.br) (T.E.A.F.);

## TABLE OF CONTENTS

|                                      |    |
|--------------------------------------|----|
| 1. NMR spectra and Mass spectra..... | 2  |
| 2. 1BNA Cross-docking.....           | 32 |

## 1. NMR spectra

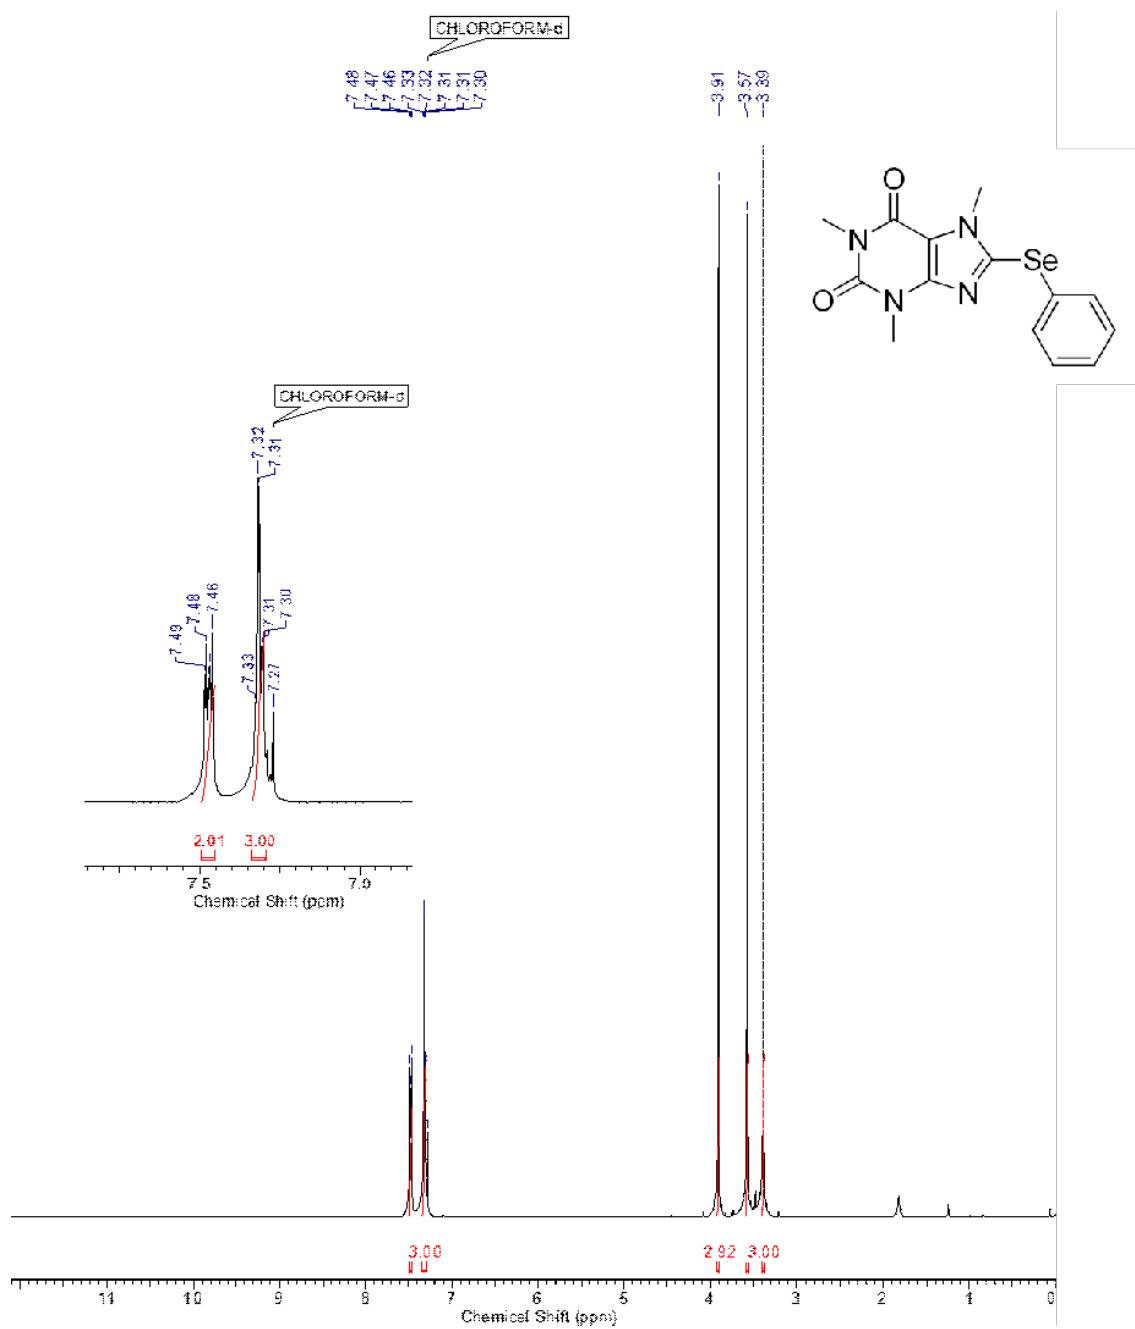

$^1\text{H}$  NMR (400 MHz,  $\text{CDCl}_3$ ) spectrum of **3**.

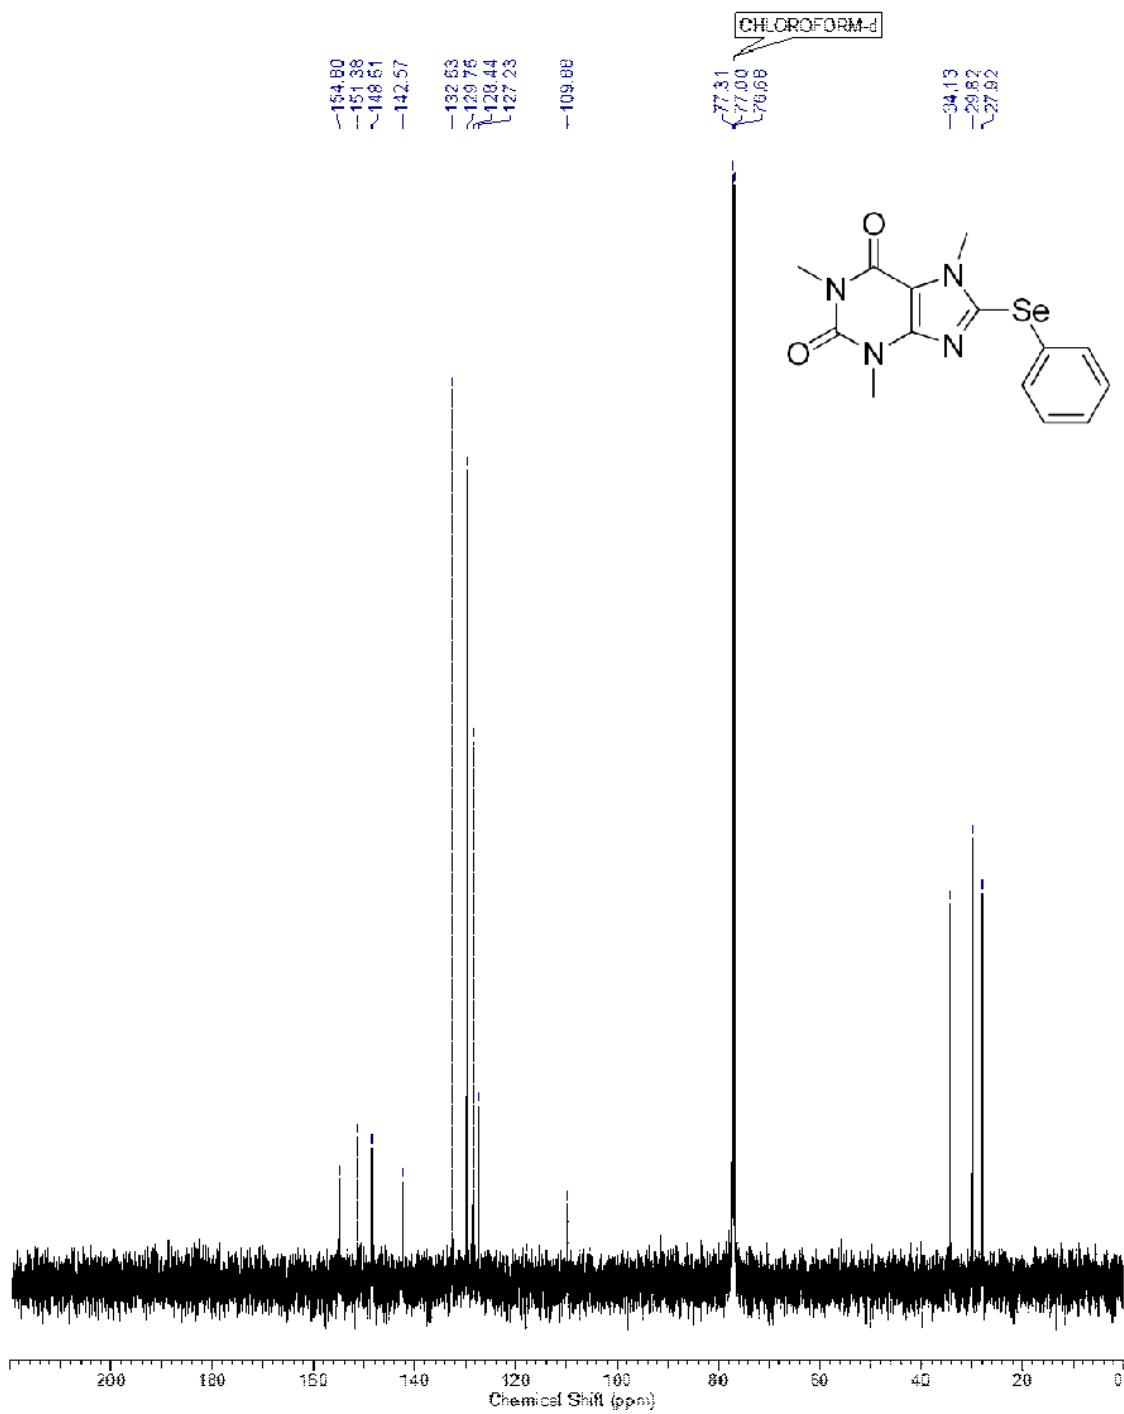

$^{13}\text{C}$  NMR (100 MHz,  $\text{CDCl}_3$ ) spectrum of **3**.

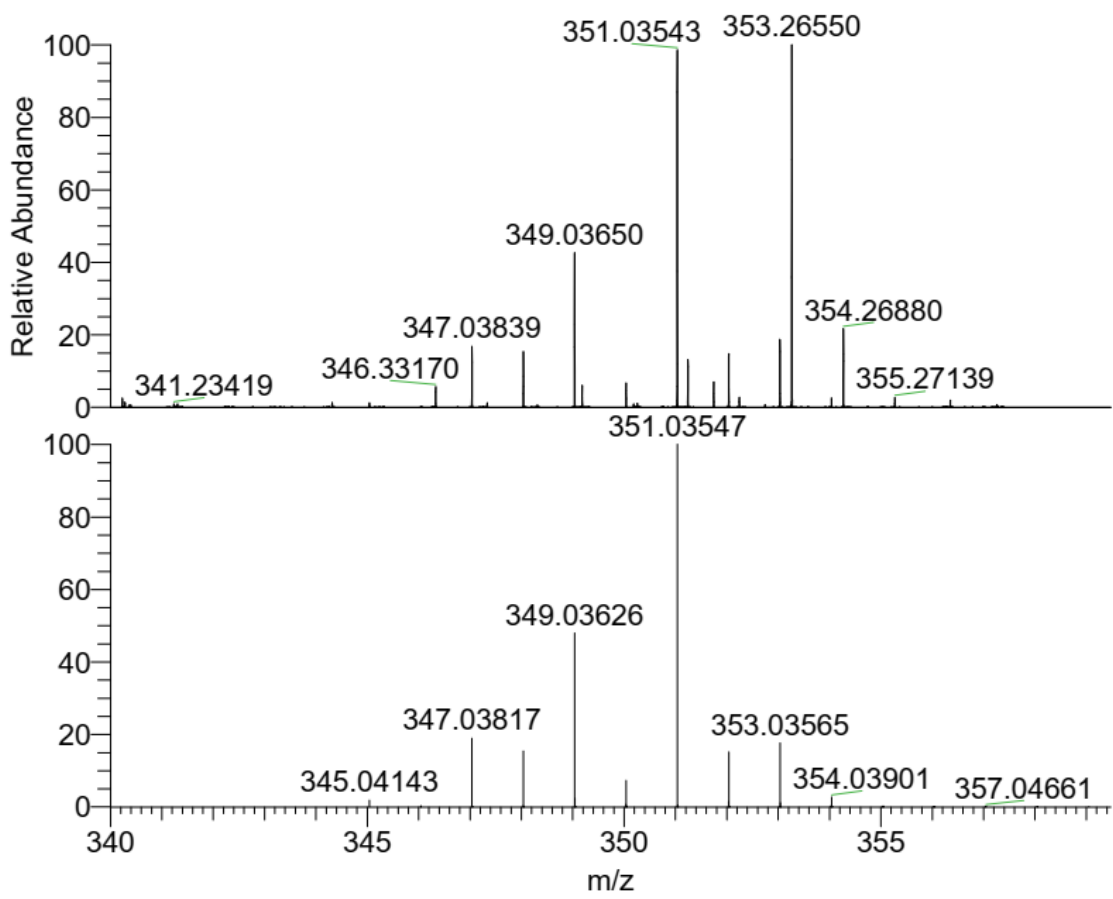

HRMS (ESI) - [M+H]<sup>+</sup> of 3

|                        |                                                                                              |                       |                      |                        |        |
|------------------------|----------------------------------------------------------------------------------------------|-----------------------|----------------------|------------------------|--------|
| Acquisition Time (sec) | 3.9715                                                                                       | Date                  | 06 Jun 2024 12:40:48 |                        |        |
| Date Stamp             | 06 Jun 2024 12:40:48                                                                         |                       |                      |                        |        |
| File Name              | C:\Users\suzane\Desktop\RMN_Cafeina\FSe+CAF_CDCl3\024_Junho\NataC_FSe+CAF_CDCl3\1\pdata\1\1r |                       |                      |                        |        |
| Frequency (MHz)        | 400.06                                                                                       | Nucleus               | 1H                   | Number of Transients   | 4      |
| Origin                 | spect                                                                                        | Original Points Count | 32768                | Owner                  | root   |
| Points Count           | 32768                                                                                        | Pulse Sequence        | zg30                 | Receiver Gain          | 143.70 |
| SW(cyclical) (Hz)      | 8250.83                                                                                      | Solvent               | CHLOROFORM-d         |                        |        |
| Spectrum Offset (Hz)   | 2468.9277                                                                                    | Sweep Width (Hz)      | 8250.57              | Temperature (degree C) | 27.000 |

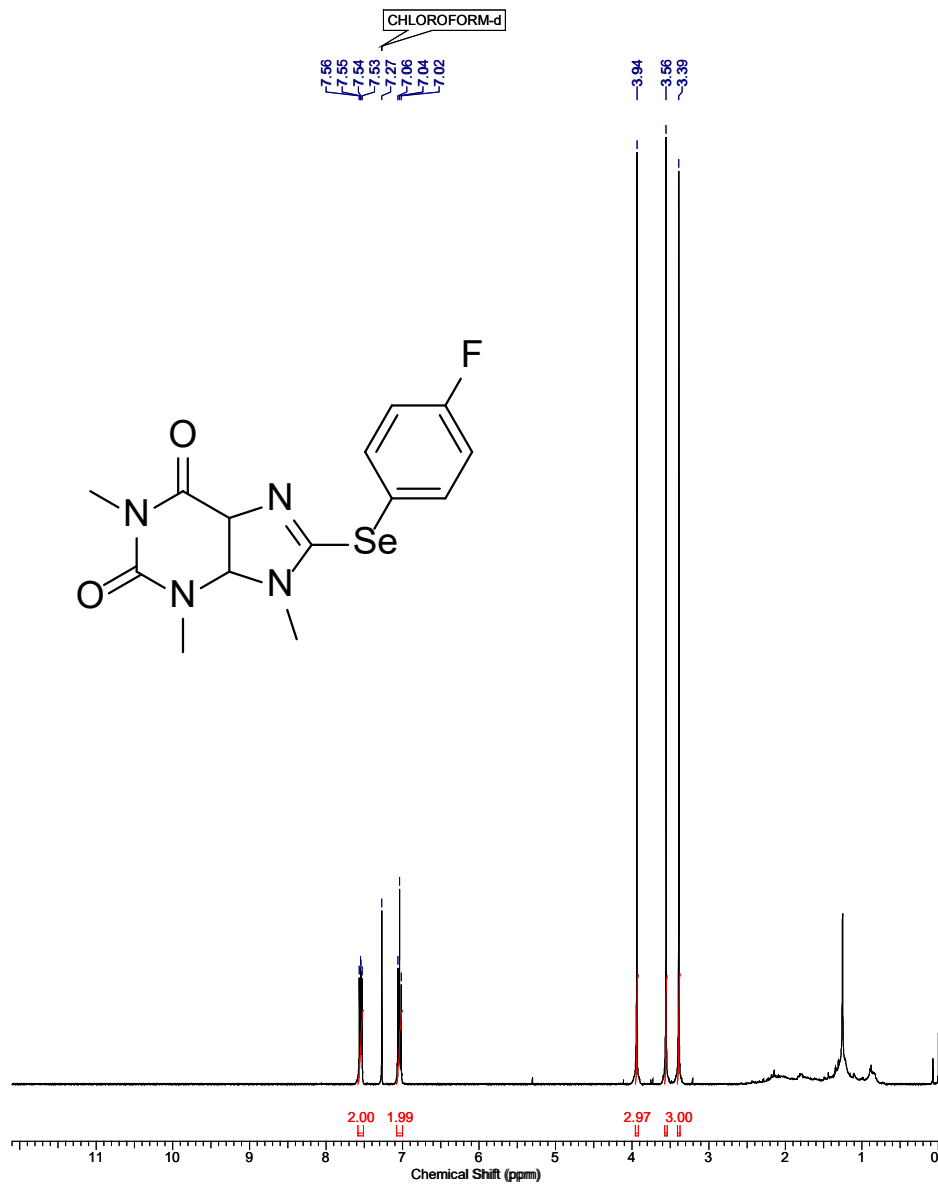

$^1\text{H}$  NMR (400 MHz,  $\text{CDCl}_3$ ) spectrum of **4**.

|                        |                                                                                             |                       |                      |                        |        |
|------------------------|---------------------------------------------------------------------------------------------|-----------------------|----------------------|------------------------|--------|
| Acquisition Time (sec) | 1.3631                                                                                      | Date                  | 06 Jun 2024 13:25:36 |                        |        |
| Date Stamp             | 06 Jun 2024 13:25:36                                                                        |                       |                      |                        |        |
| File Name              | C:\Users\suzane\Desktop\RMN_Cafeina\FSe+CAF_CDCl3\024_Junho\NataC_FSe+CAF_CDCl3\2\pdata1\1r |                       |                      |                        |        |
| Frequency (MHz)        | 100.60                                                                                      | Nucleus               | 13C                  | Number of Transients   | 4352   |
| Origin                 | spect                                                                                       | Original Points Count | 32768                | Owner                  | root   |
| Points Count           | 32768                                                                                       | Pulse Sequence        | zgpg30               | Receiver Gain          | 181.00 |
| SW(cyclical) (Hz)      | 24038.46                                                                                    | Solvent               | CHLOROFORM-d         |                        |        |
| Spectrum Offset (Hz)   | 10057.0205                                                                                  | Sweep Width (Hz)      | 24037.73             | Temperature (degree C) | 27.000 |

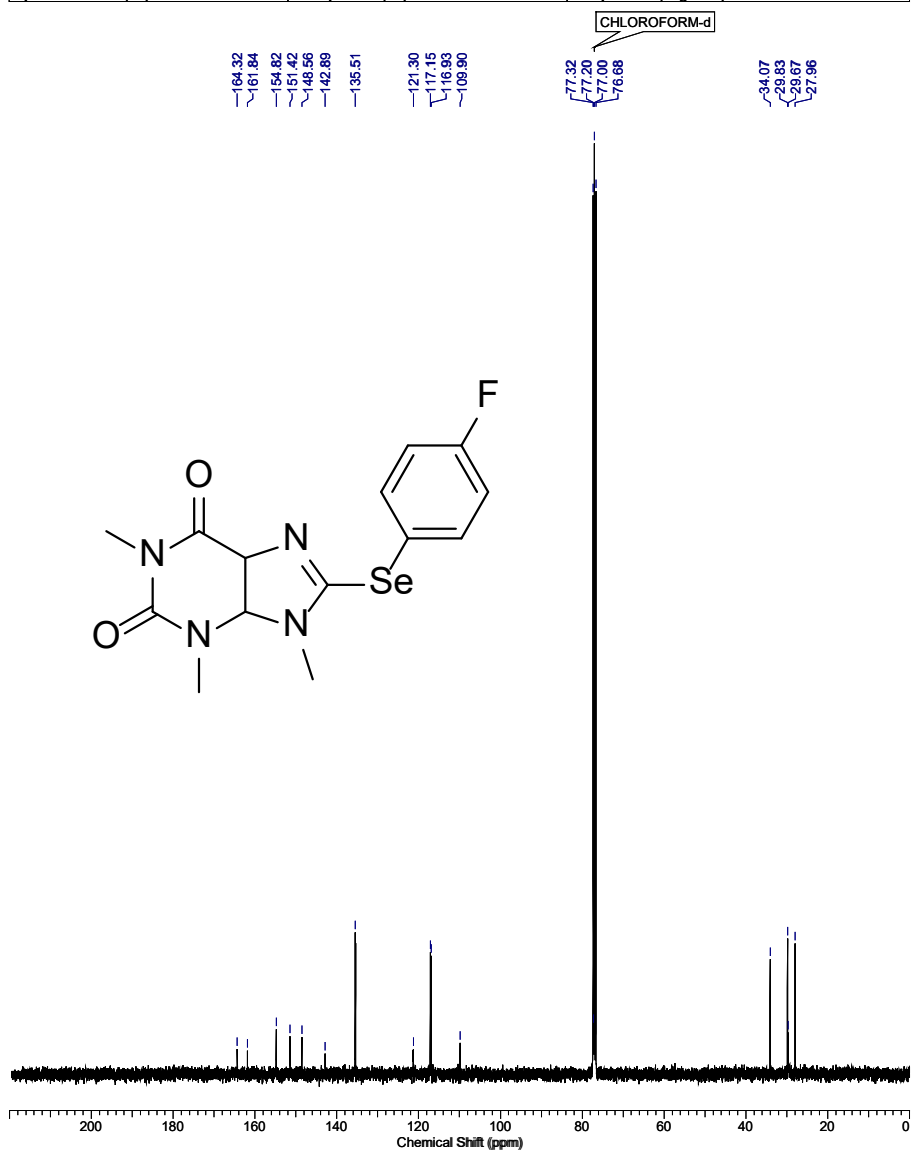

$^{13}\text{C}$  NMR (100 MHz,  $\text{CDCl}_3$ ) spectrum of 4.

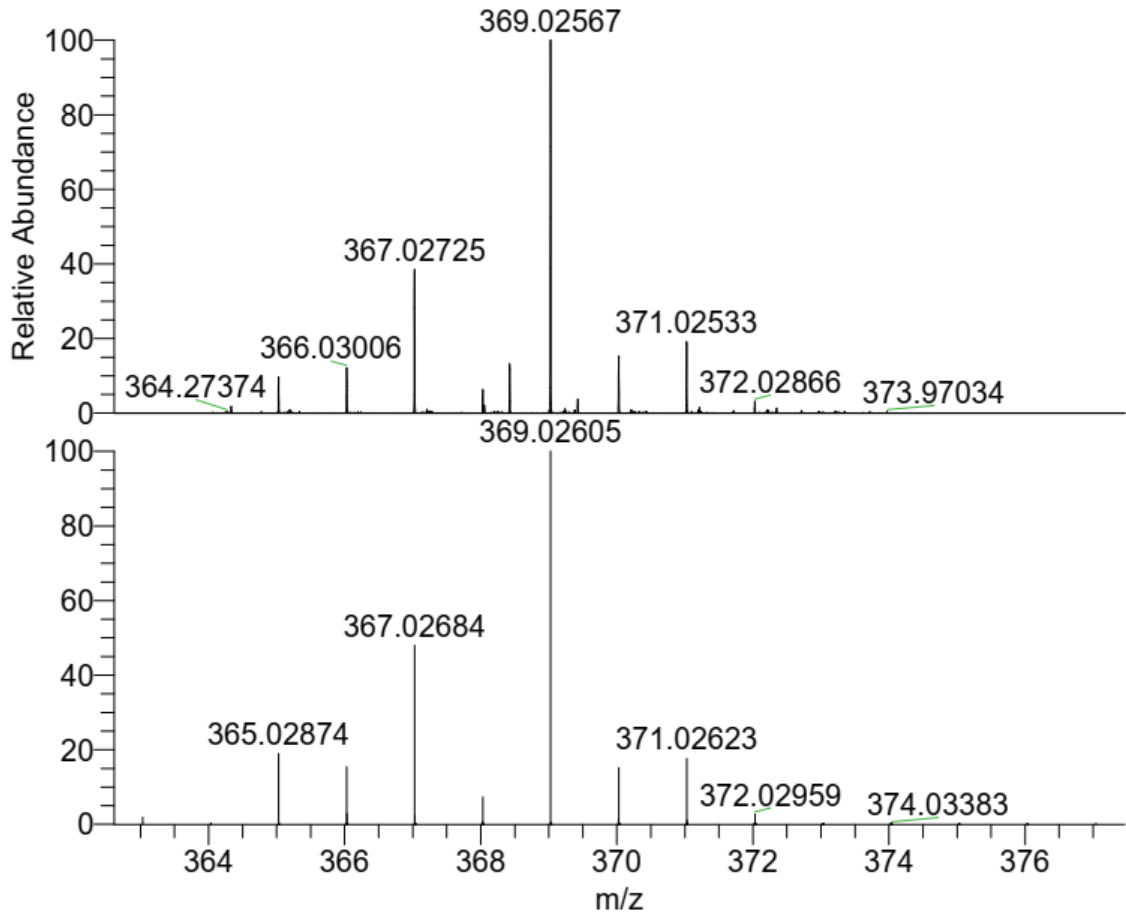

**HRMS (ESI) - [M+H]<sup>+</sup> of 4**

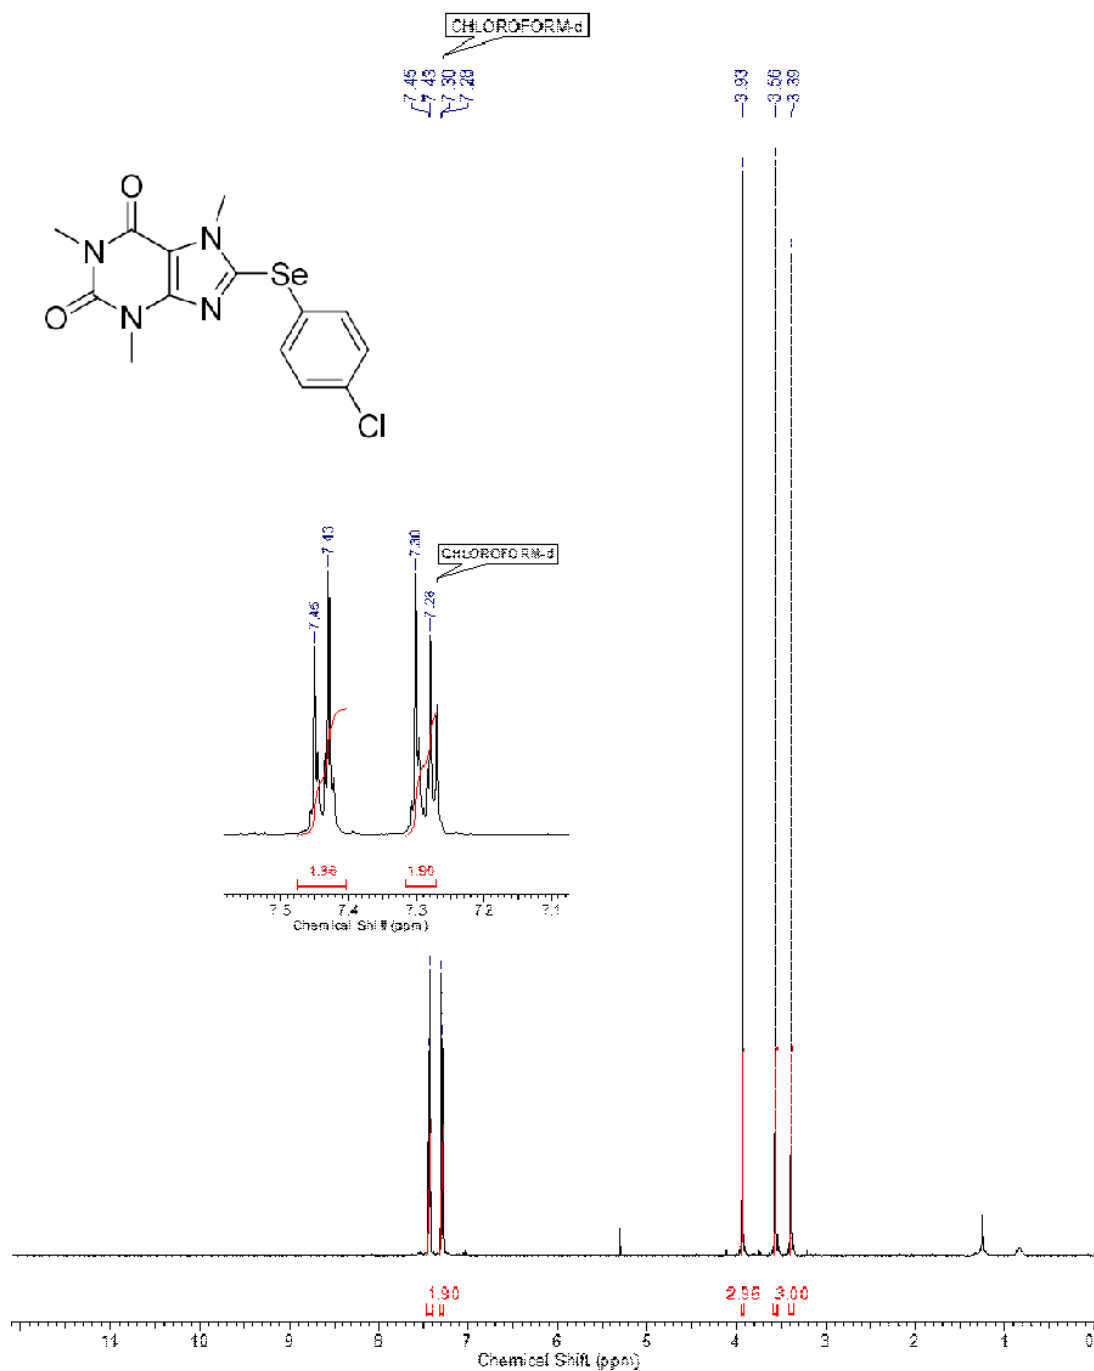

<sup>1</sup>H NMR (400 MHz, CDCl<sub>3</sub>) spectrum of 5.

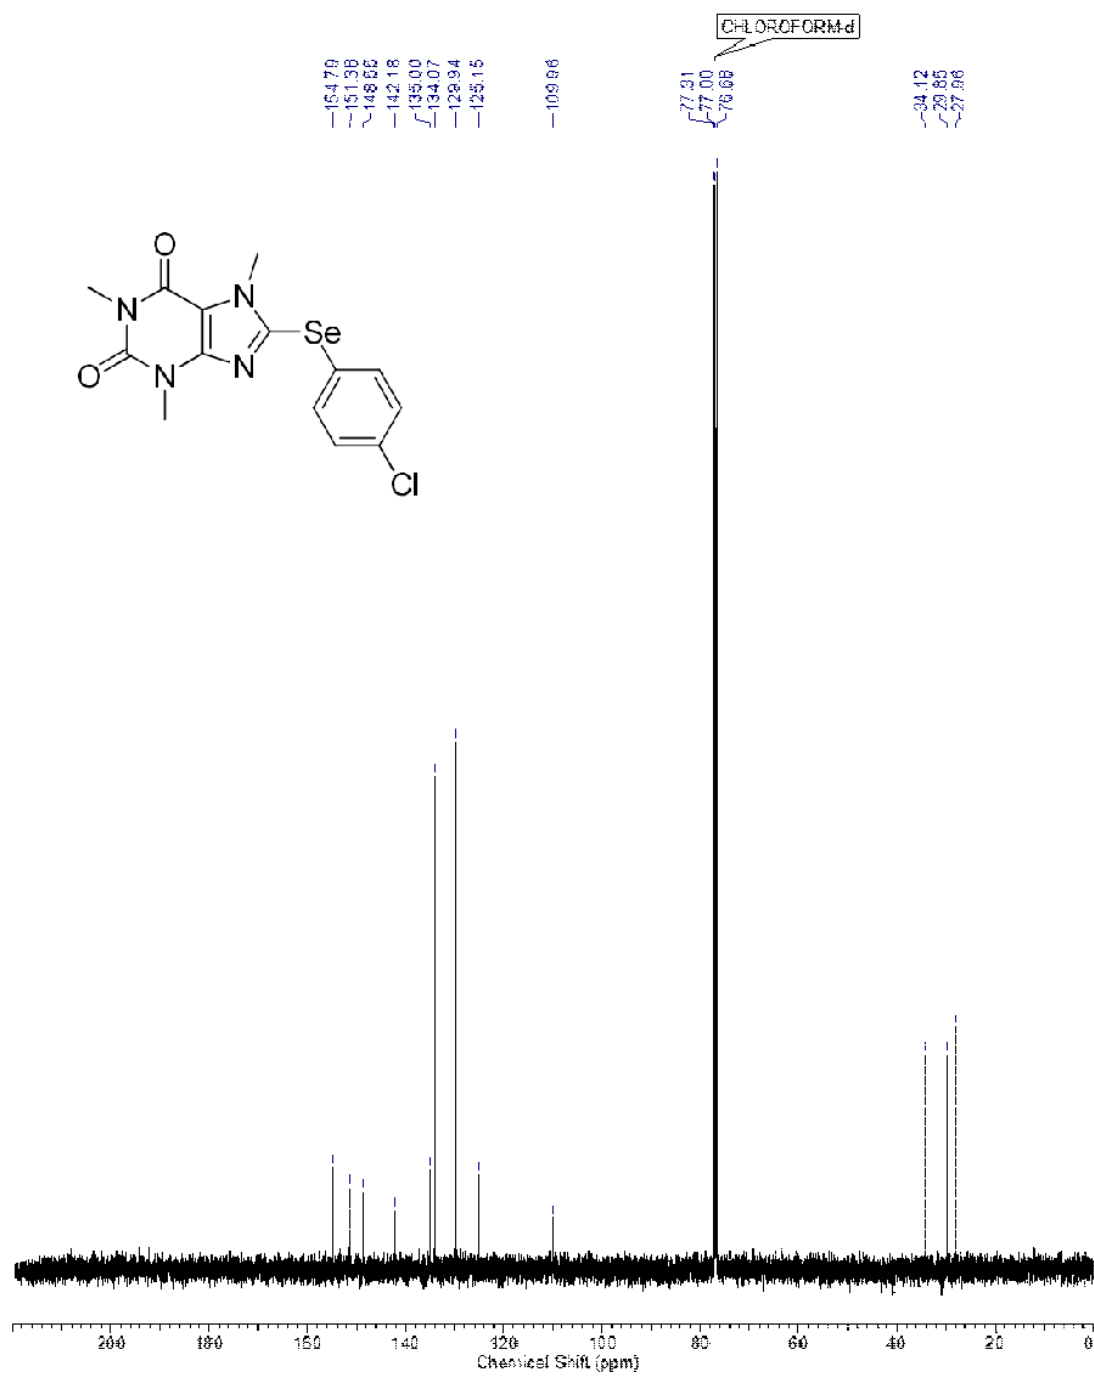

$^{13}\text{C}$  NMR (100 MHz,  $\text{CDCl}_3$ ) spectrum of **5**.

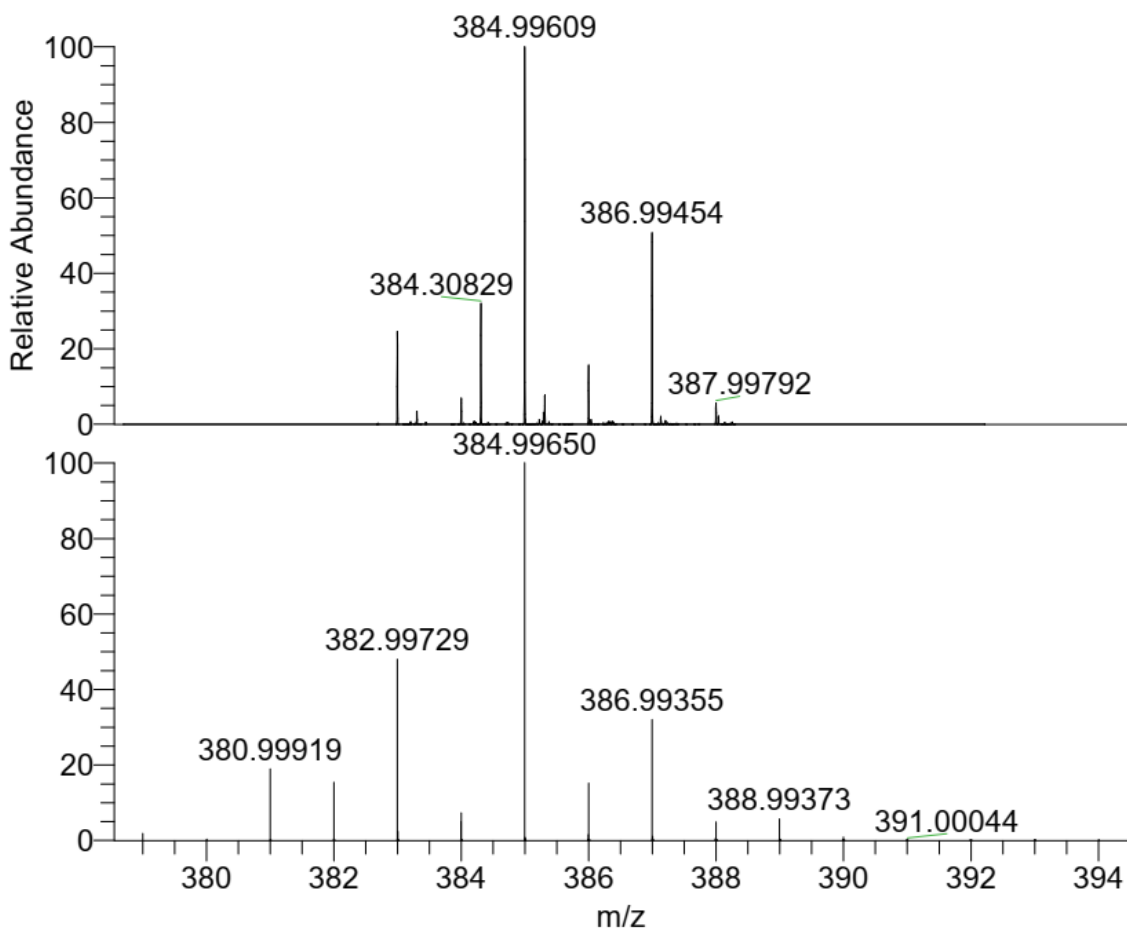

**HRMS (ESI) - [M+H]<sup>+</sup> of 5**

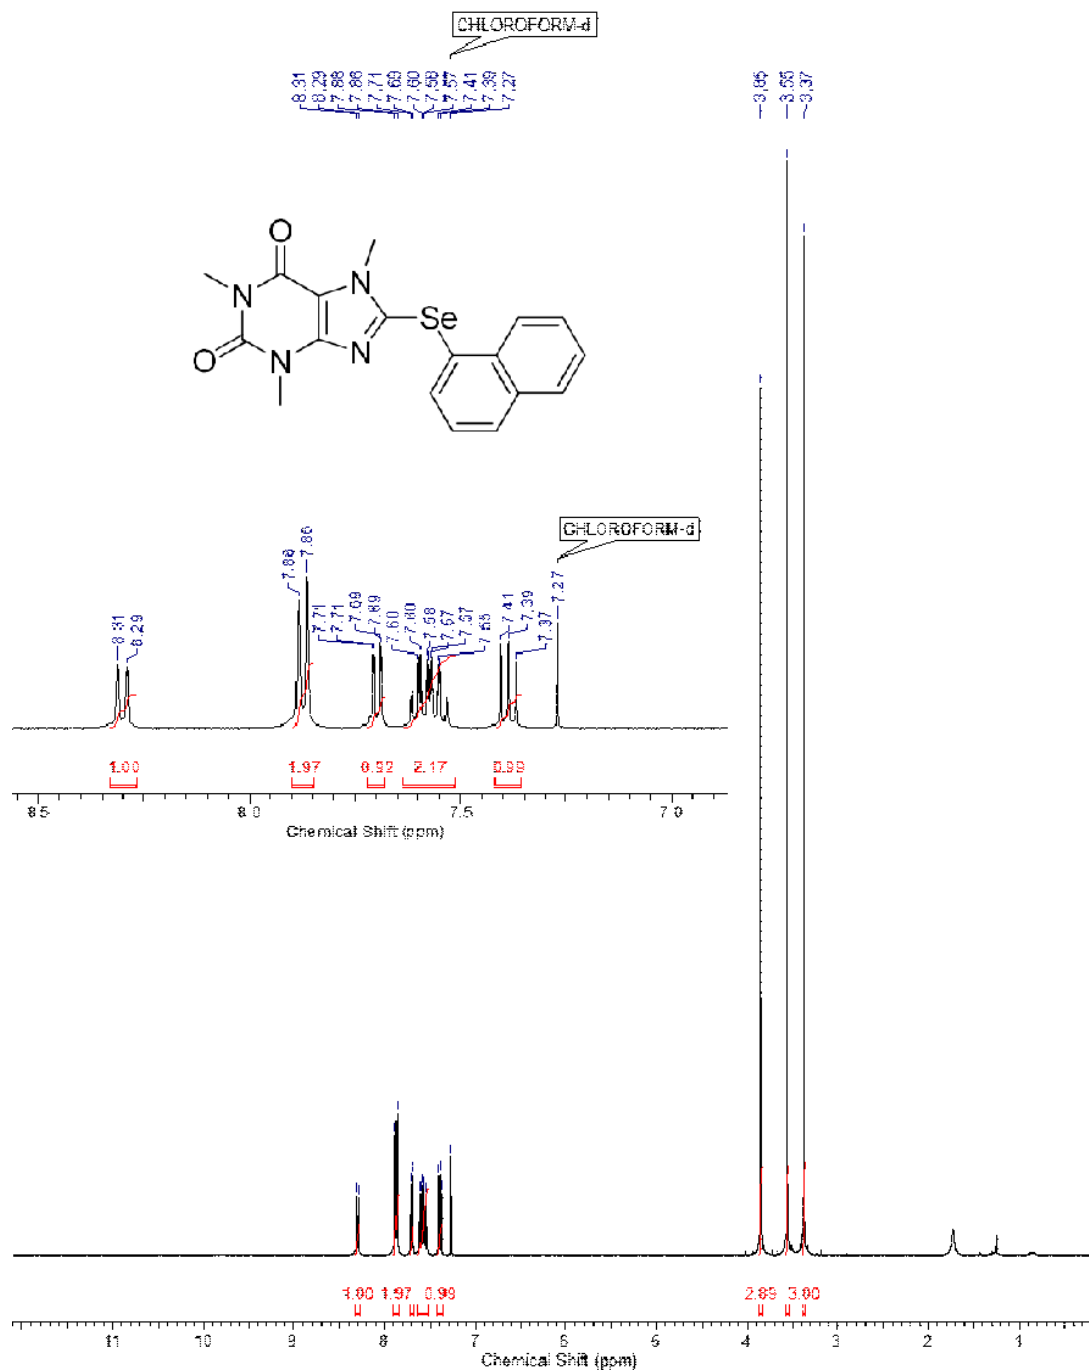

$^1\text{H}$  NMR (400 MHz,  $\text{CDCl}_3$ ) spectrum of **6**.

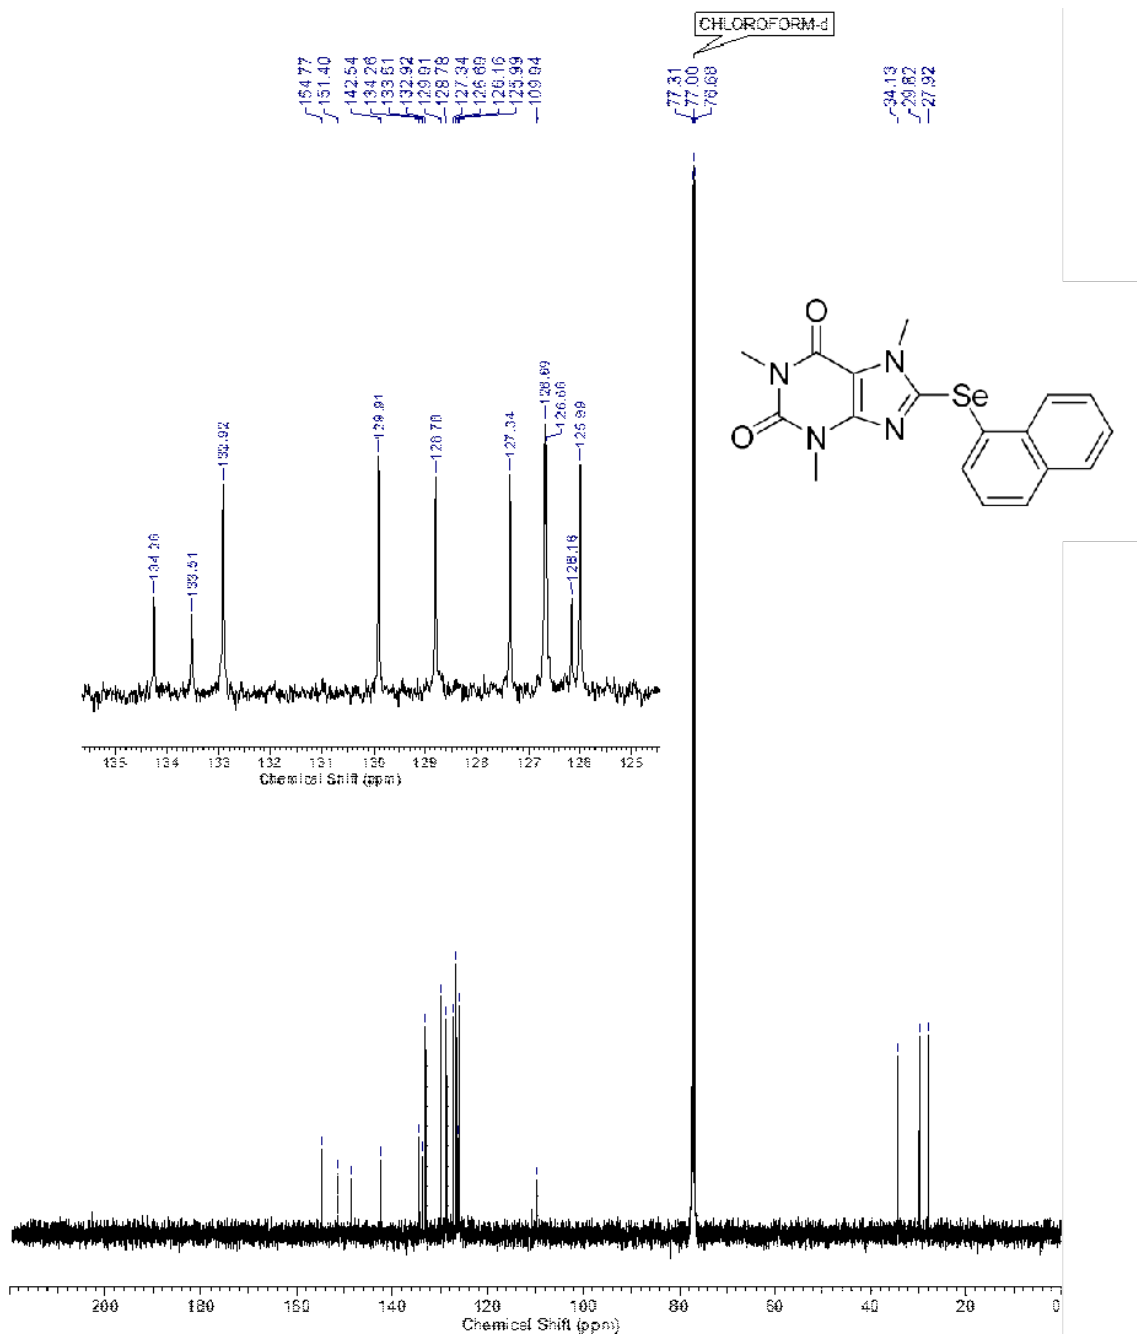

<sup>13</sup>C NMR (100 MHz, CDCl<sub>3</sub>) spectrum of 6.

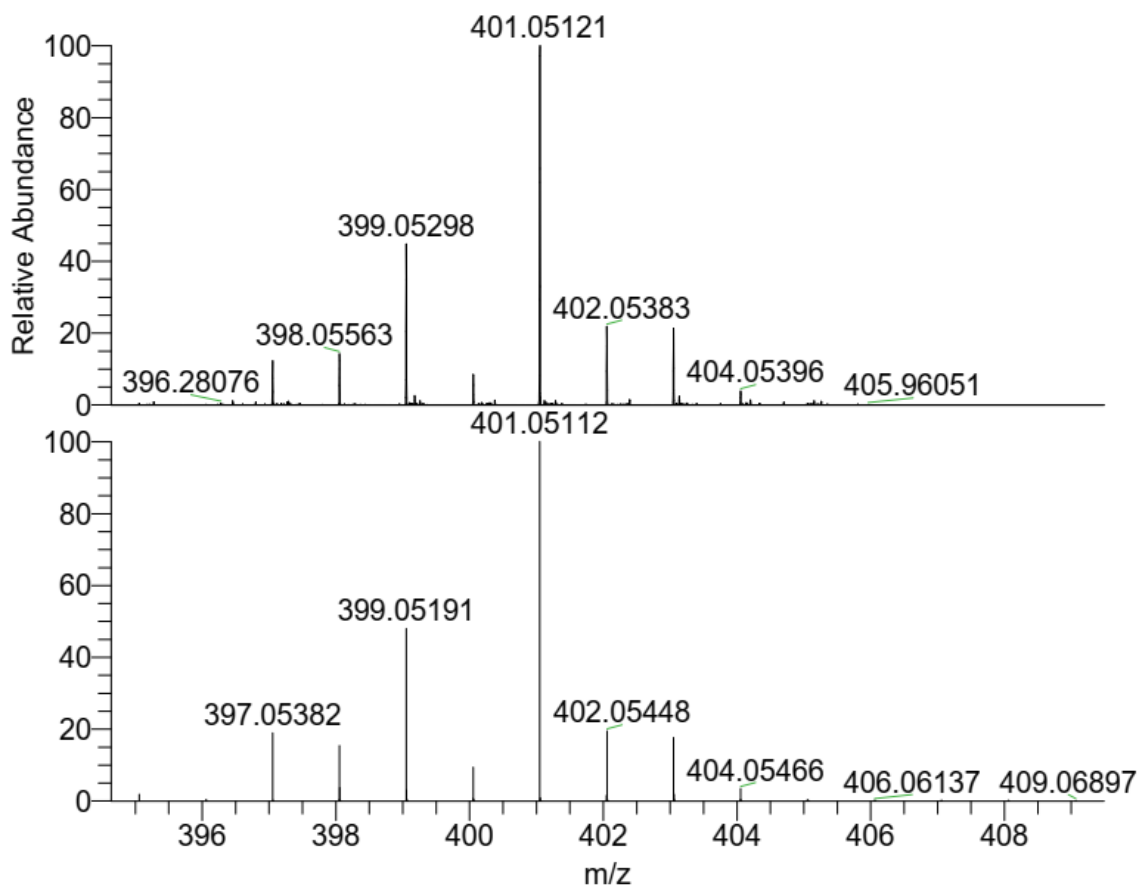

**HRMS (ESI) -  $[M+H]^+$  of 6**

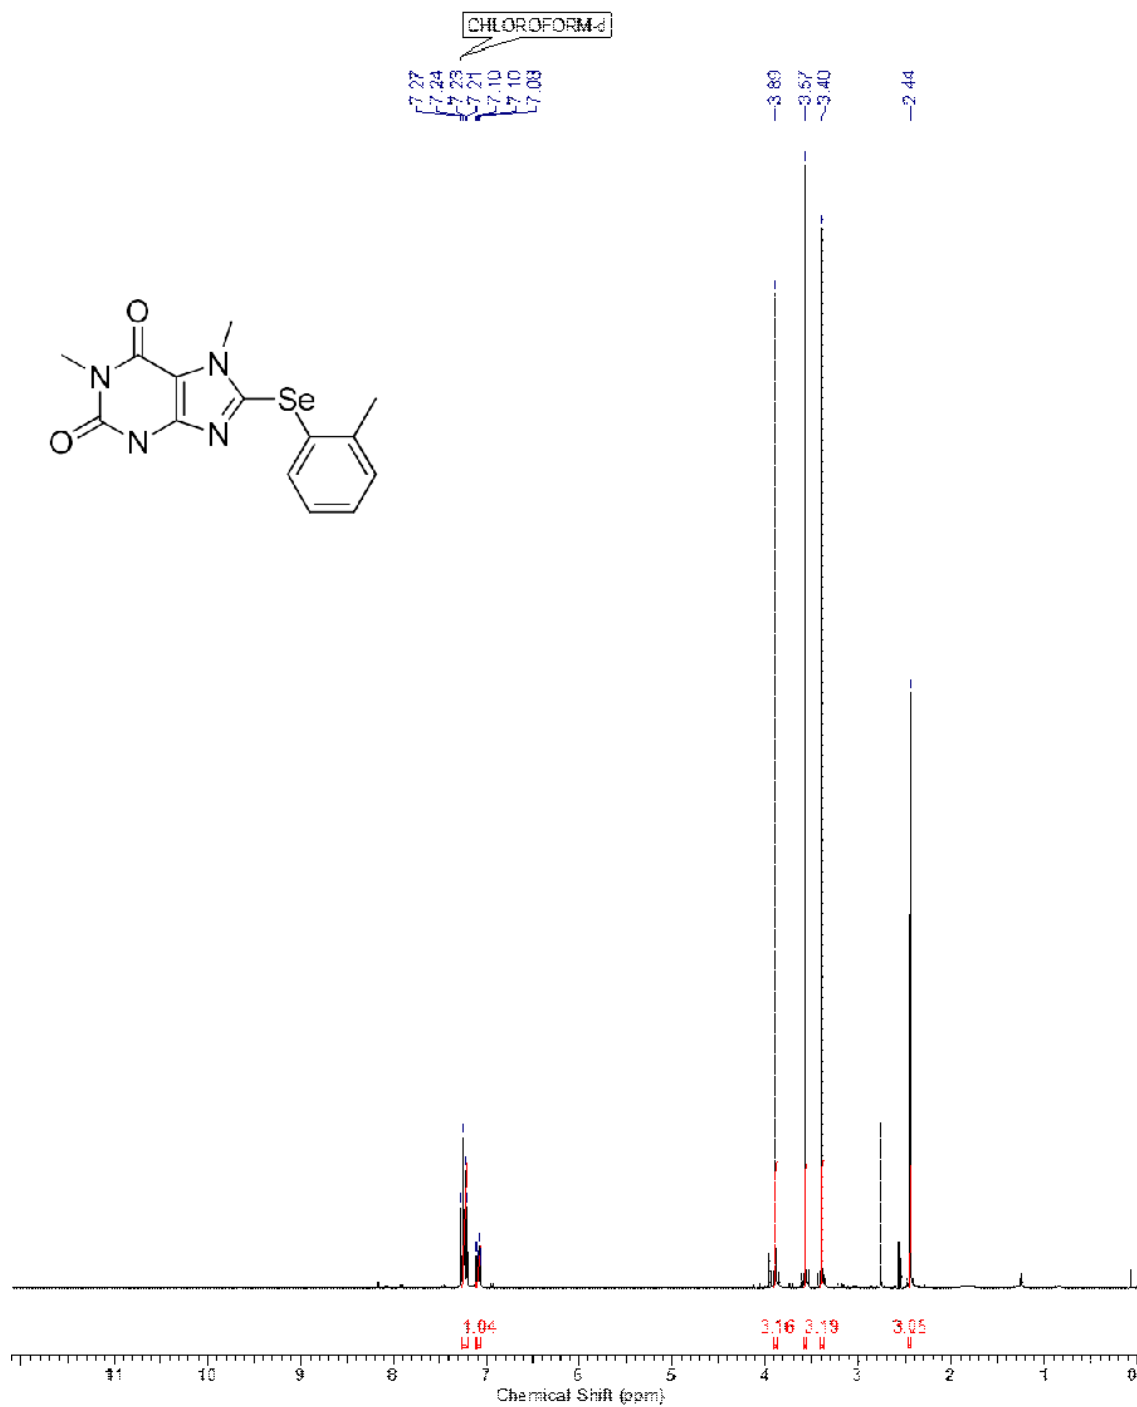

$^1\text{H}$  NMR (400 MHz,  $\text{CDCl}_3$ ) spectrum of **7**.

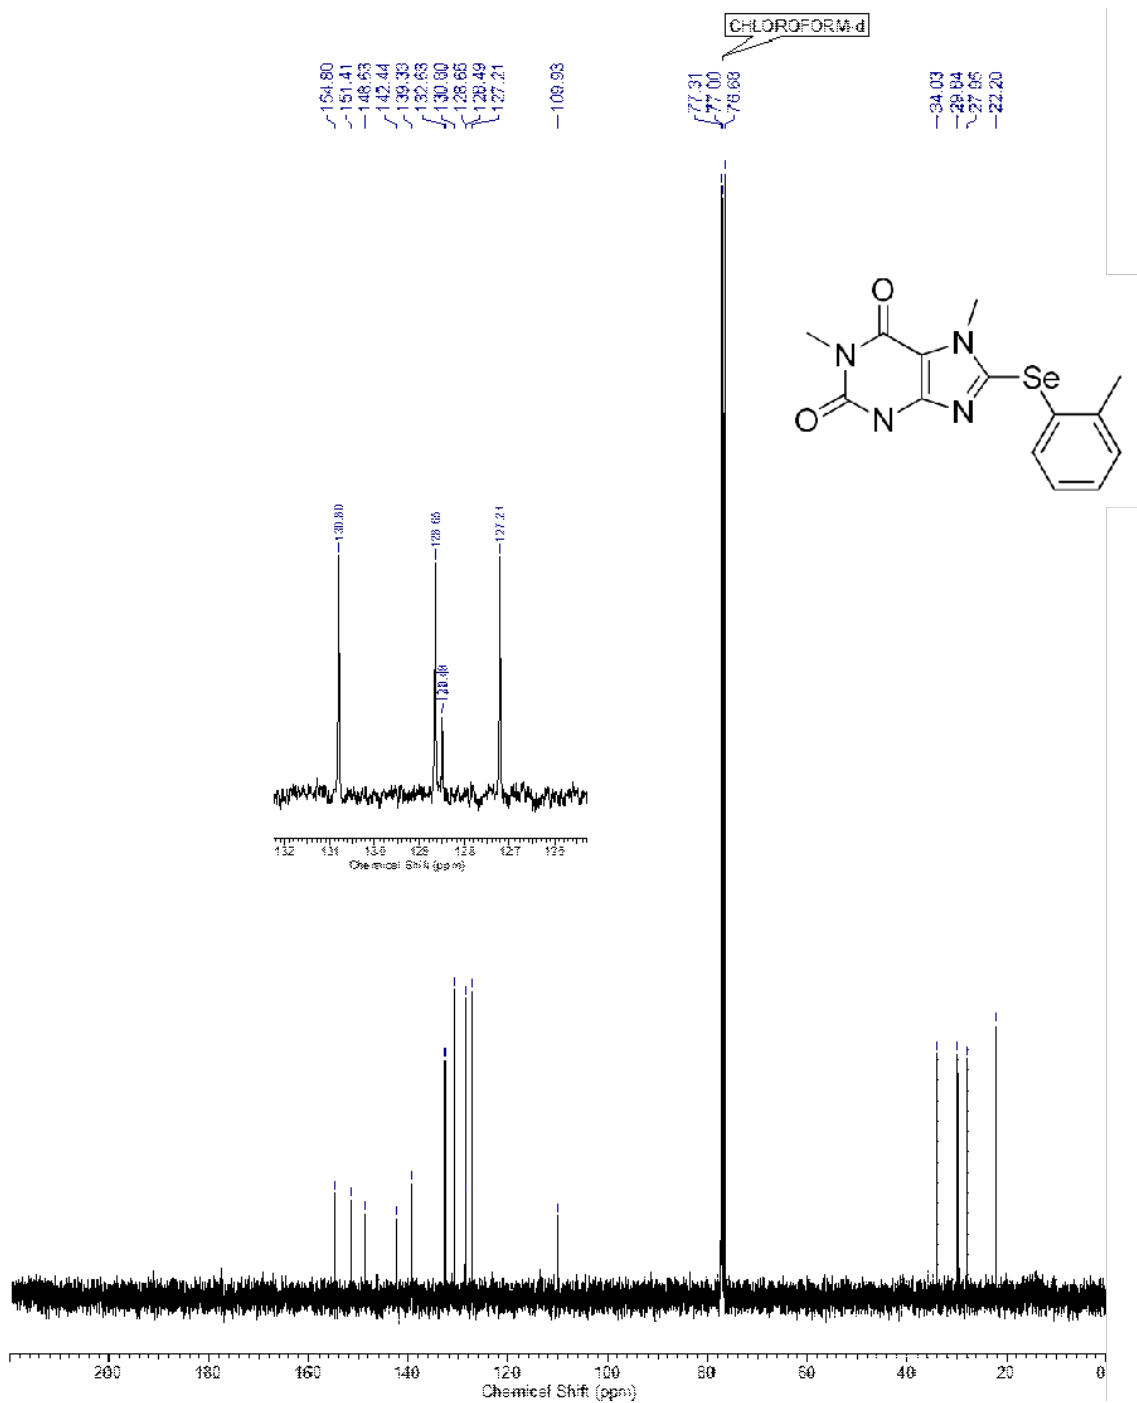

<sup>13</sup>C NMR (100 MHz, CDCl<sub>3</sub>) spectrum of 7.

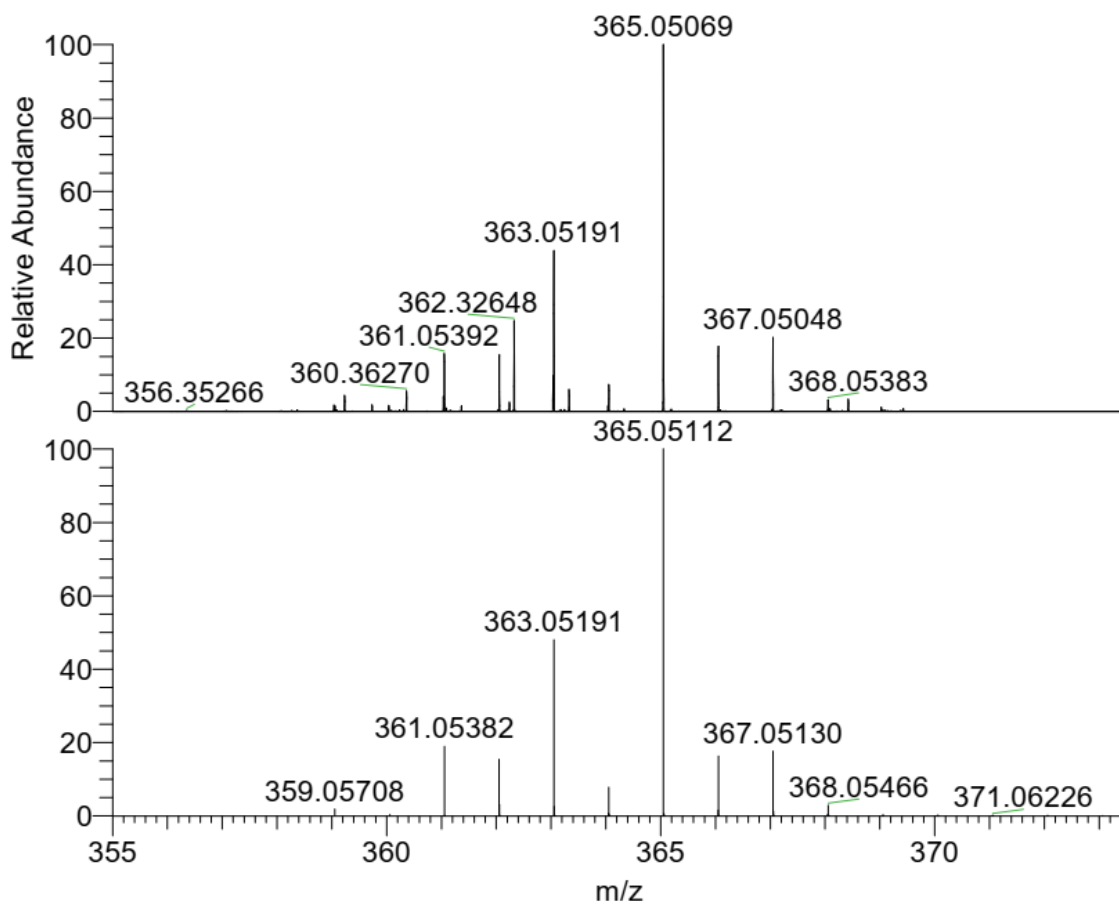

**HRMS (ESI) -  $[M+H]^+$  of 7**

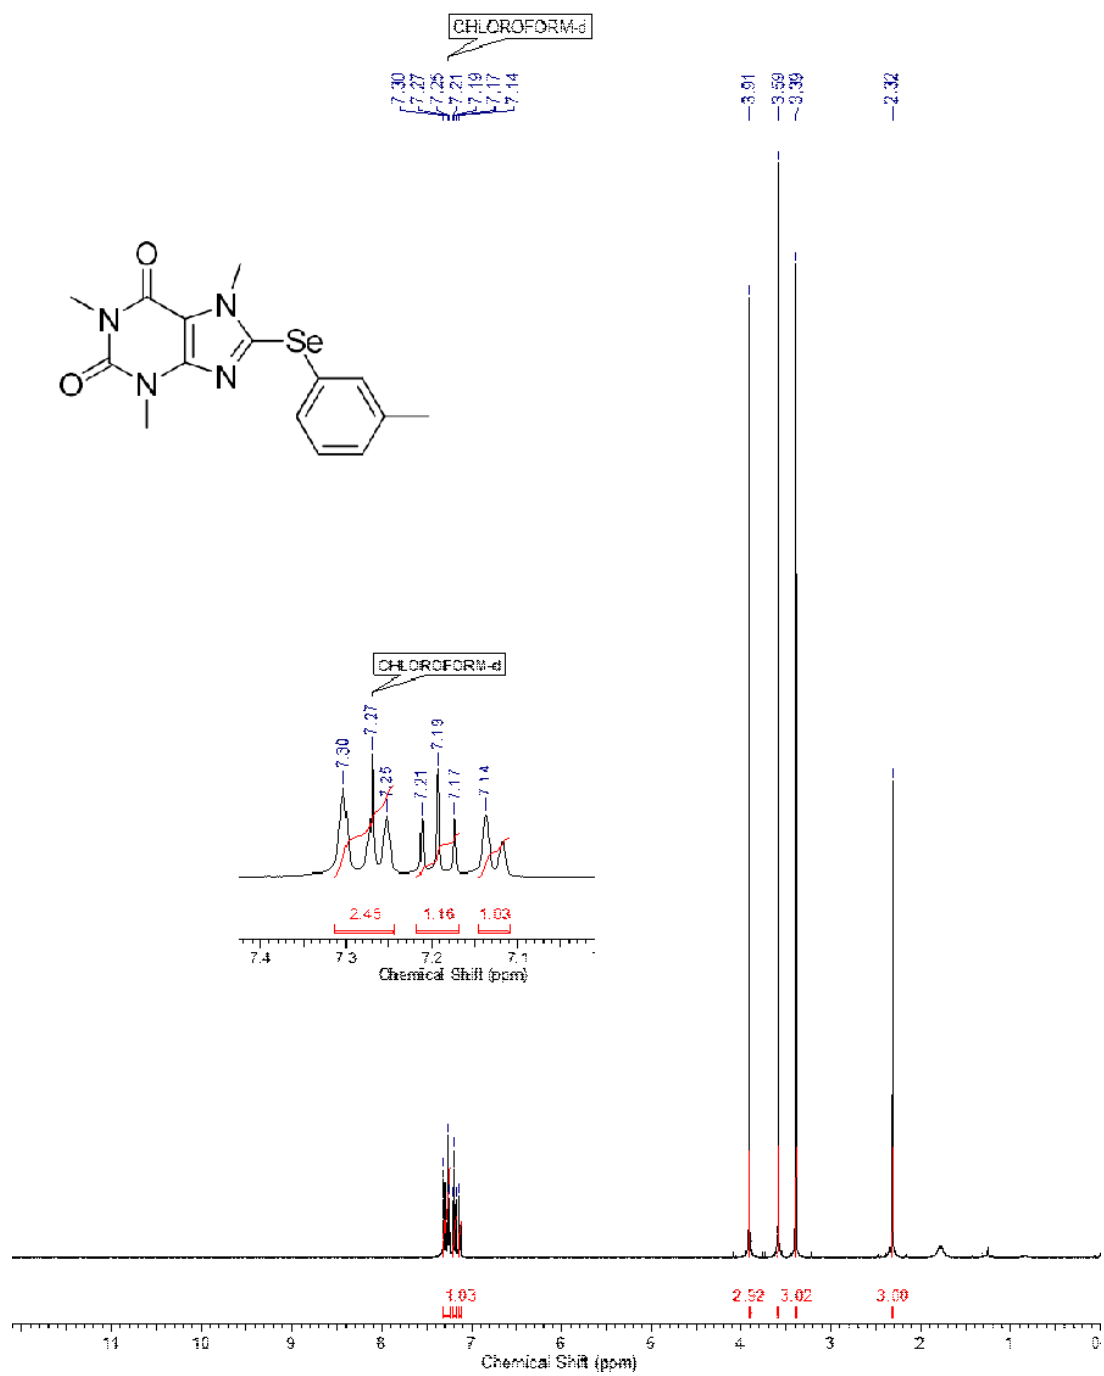

<sup>1</sup>H NMR (400 MHz, CDCl<sub>3</sub>) spectrum of **8**.

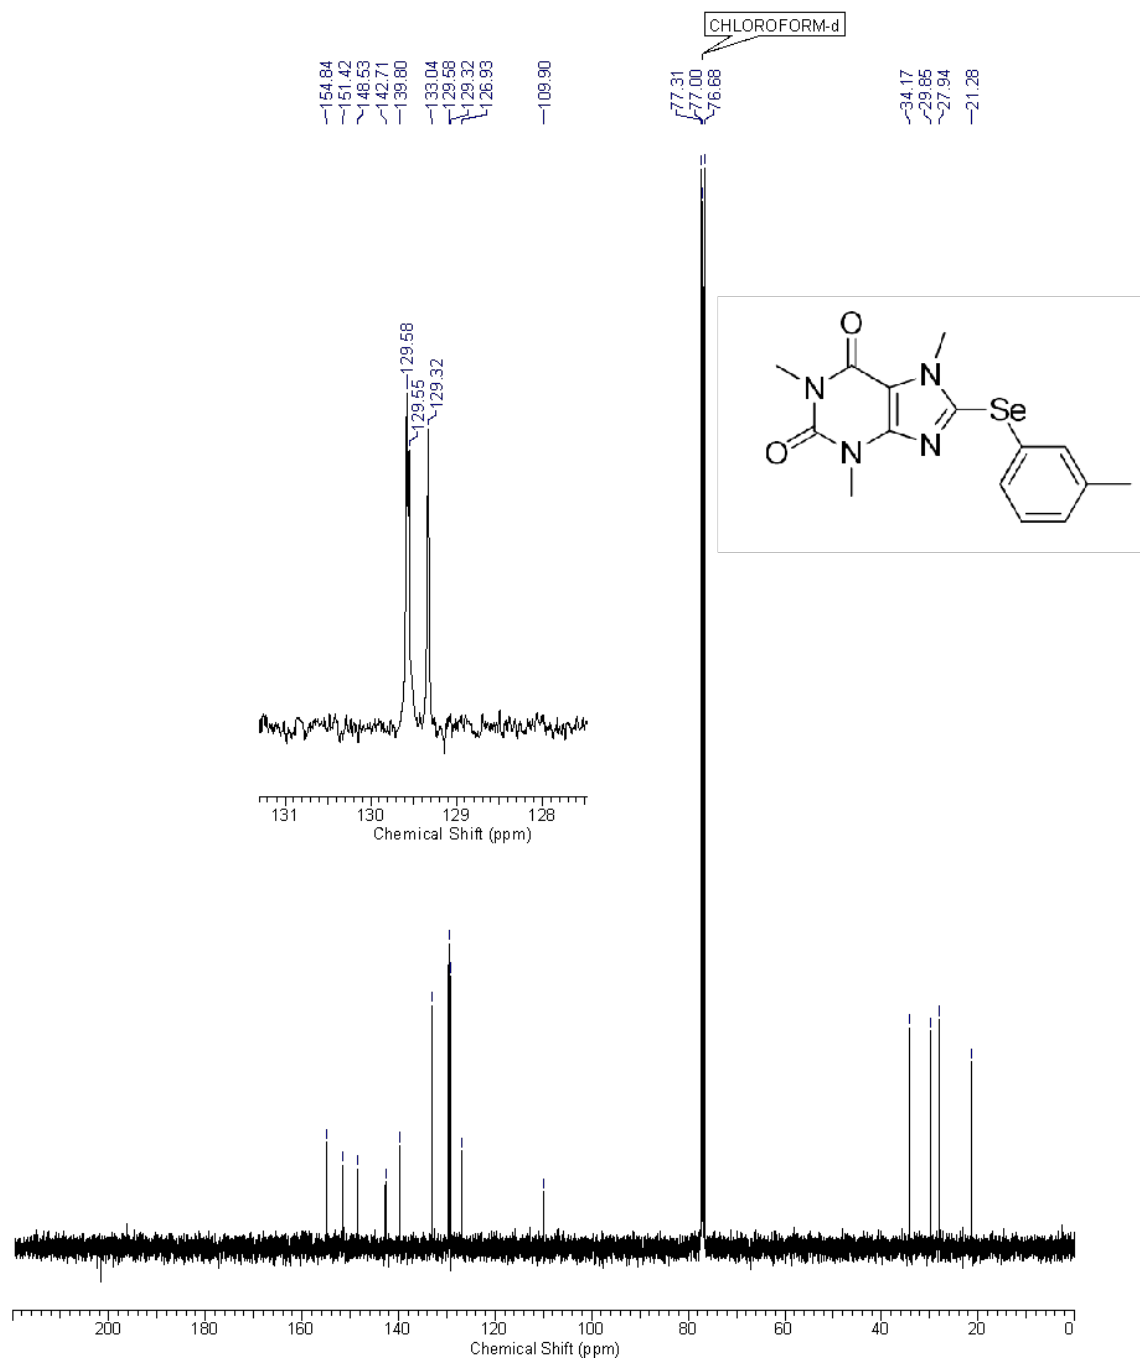

$^{13}\text{C}$  NMR (100 MHz,  $\text{CDCl}_3$ ) spectrum of **8**.

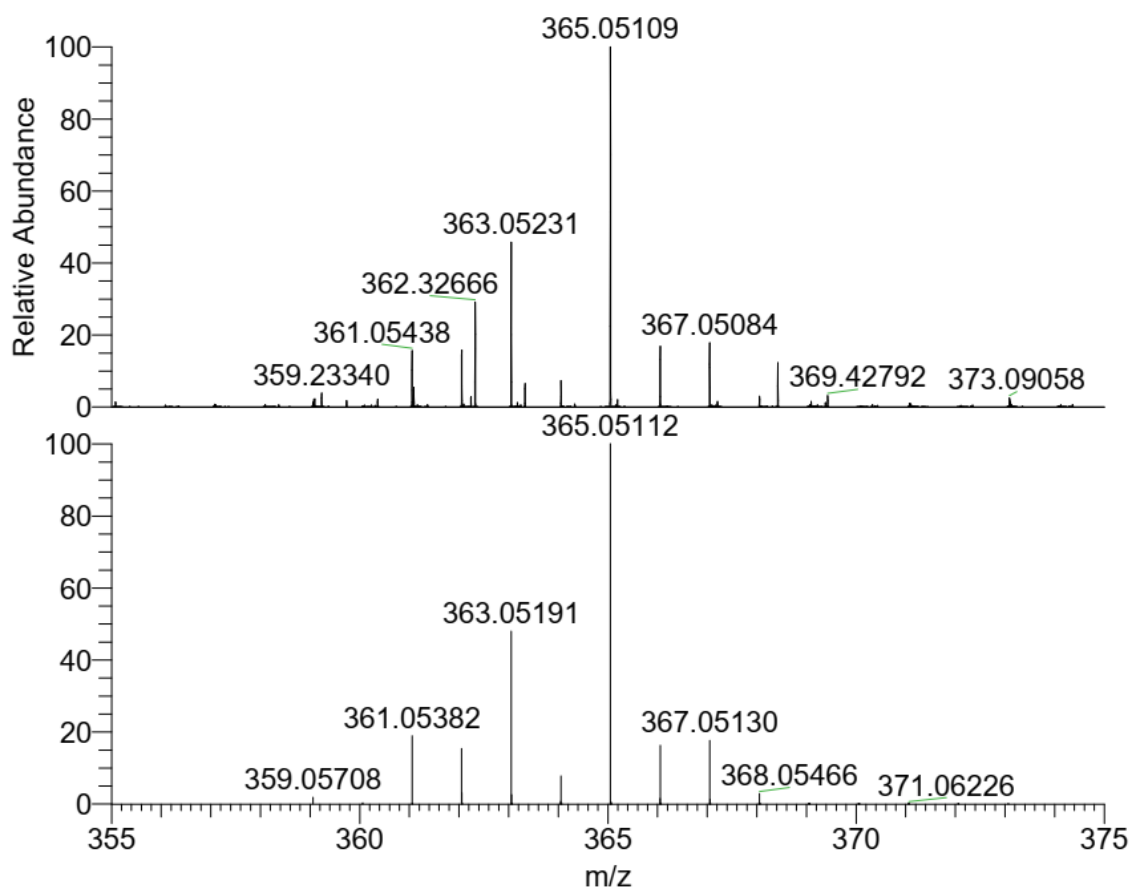

**HRMS (ESI) - [M+H]<sup>+</sup> of 8**

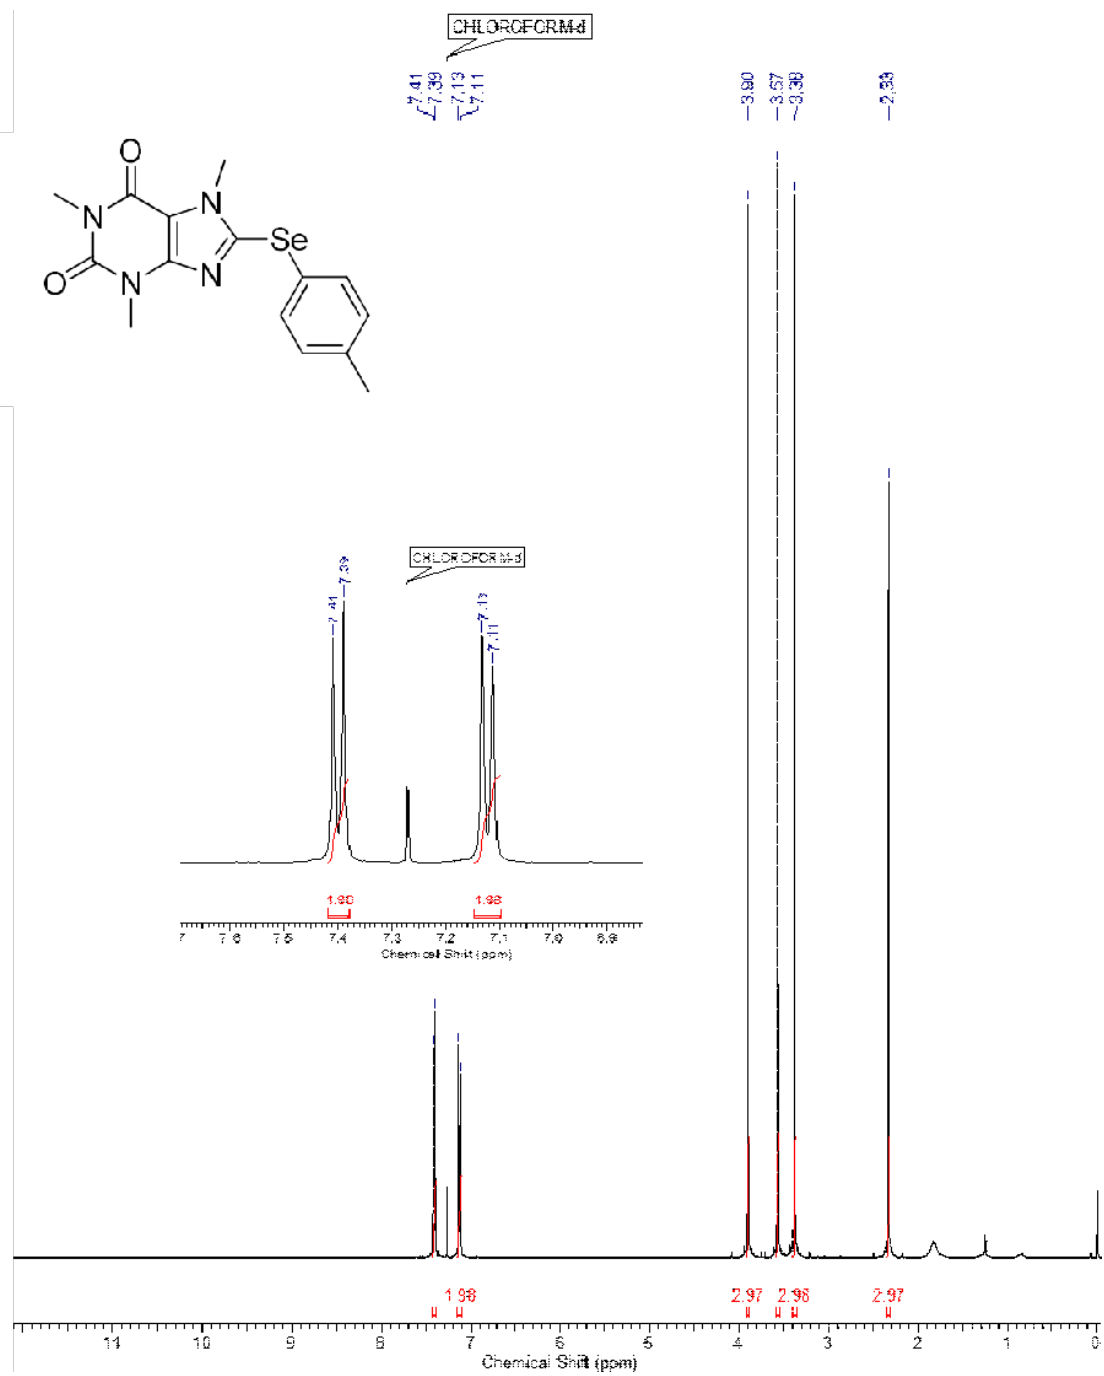

<sup>1</sup>H NMR (400 MHz, CDCl<sub>3</sub>) spectrum of **9**.

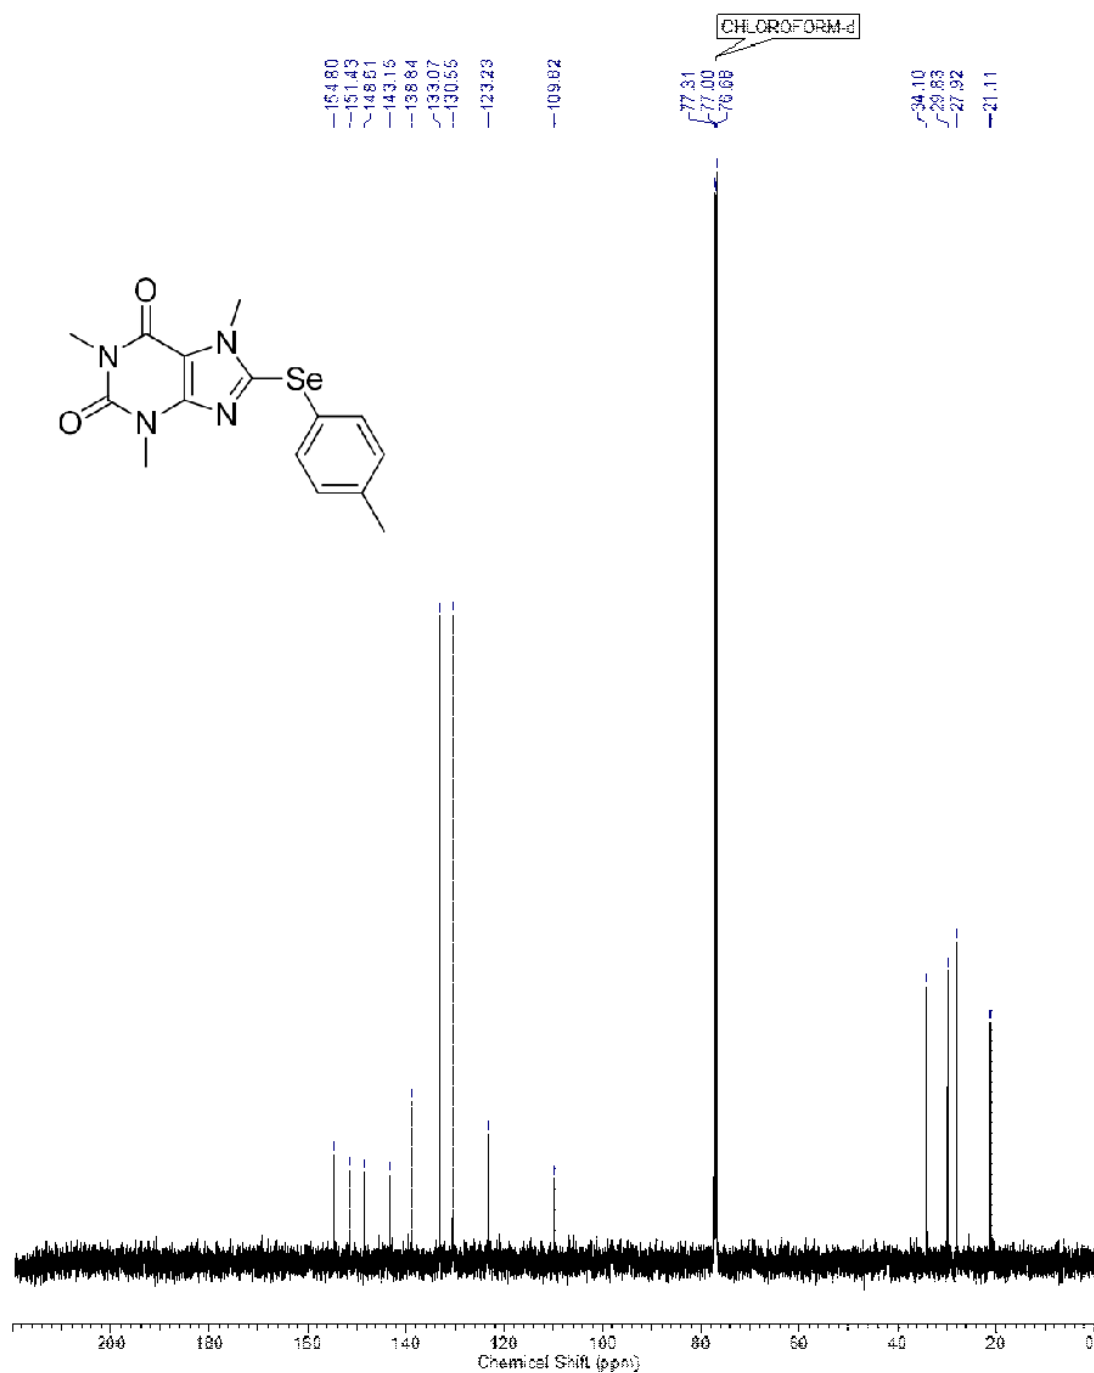

$^{13}\text{C}$  NMR (100 MHz,  $\text{CDCl}_3$ ) spectrum of **9**.

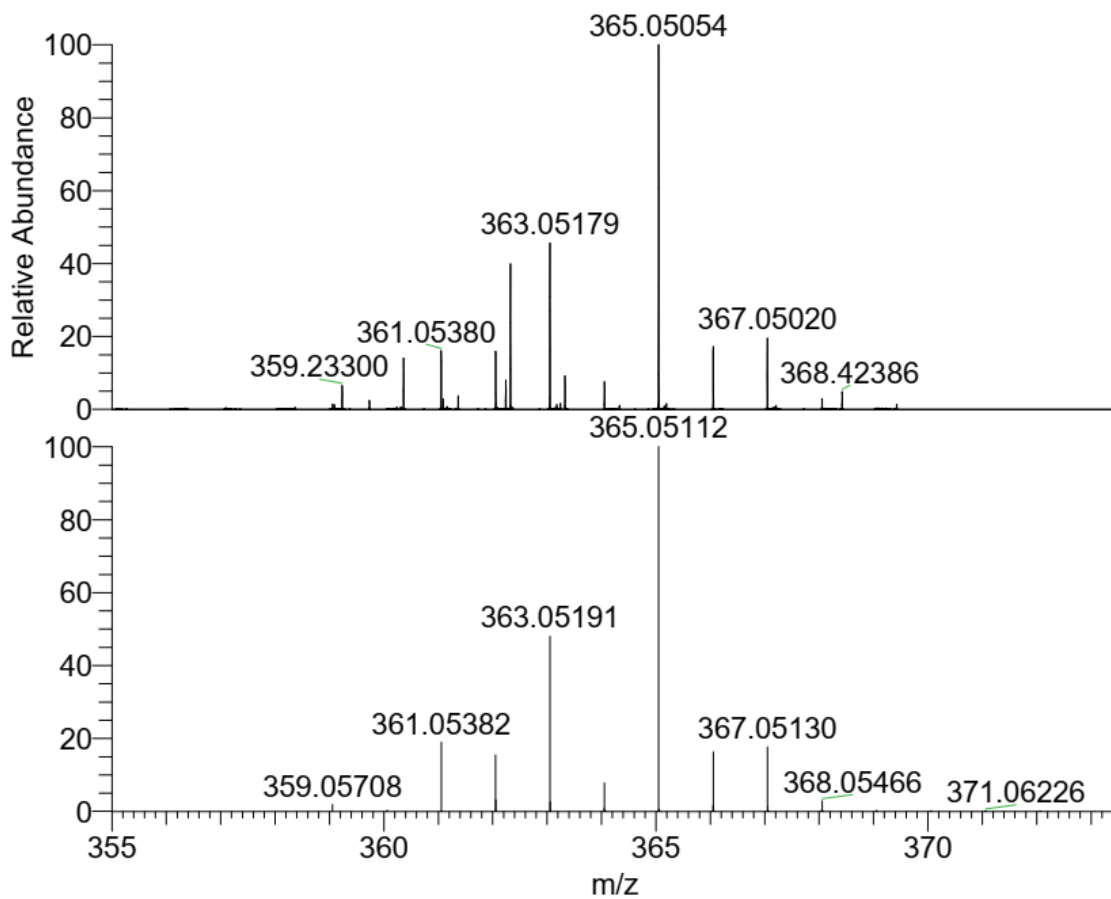

**HRMS (ESI) - [M+H]<sup>+</sup> of 9**

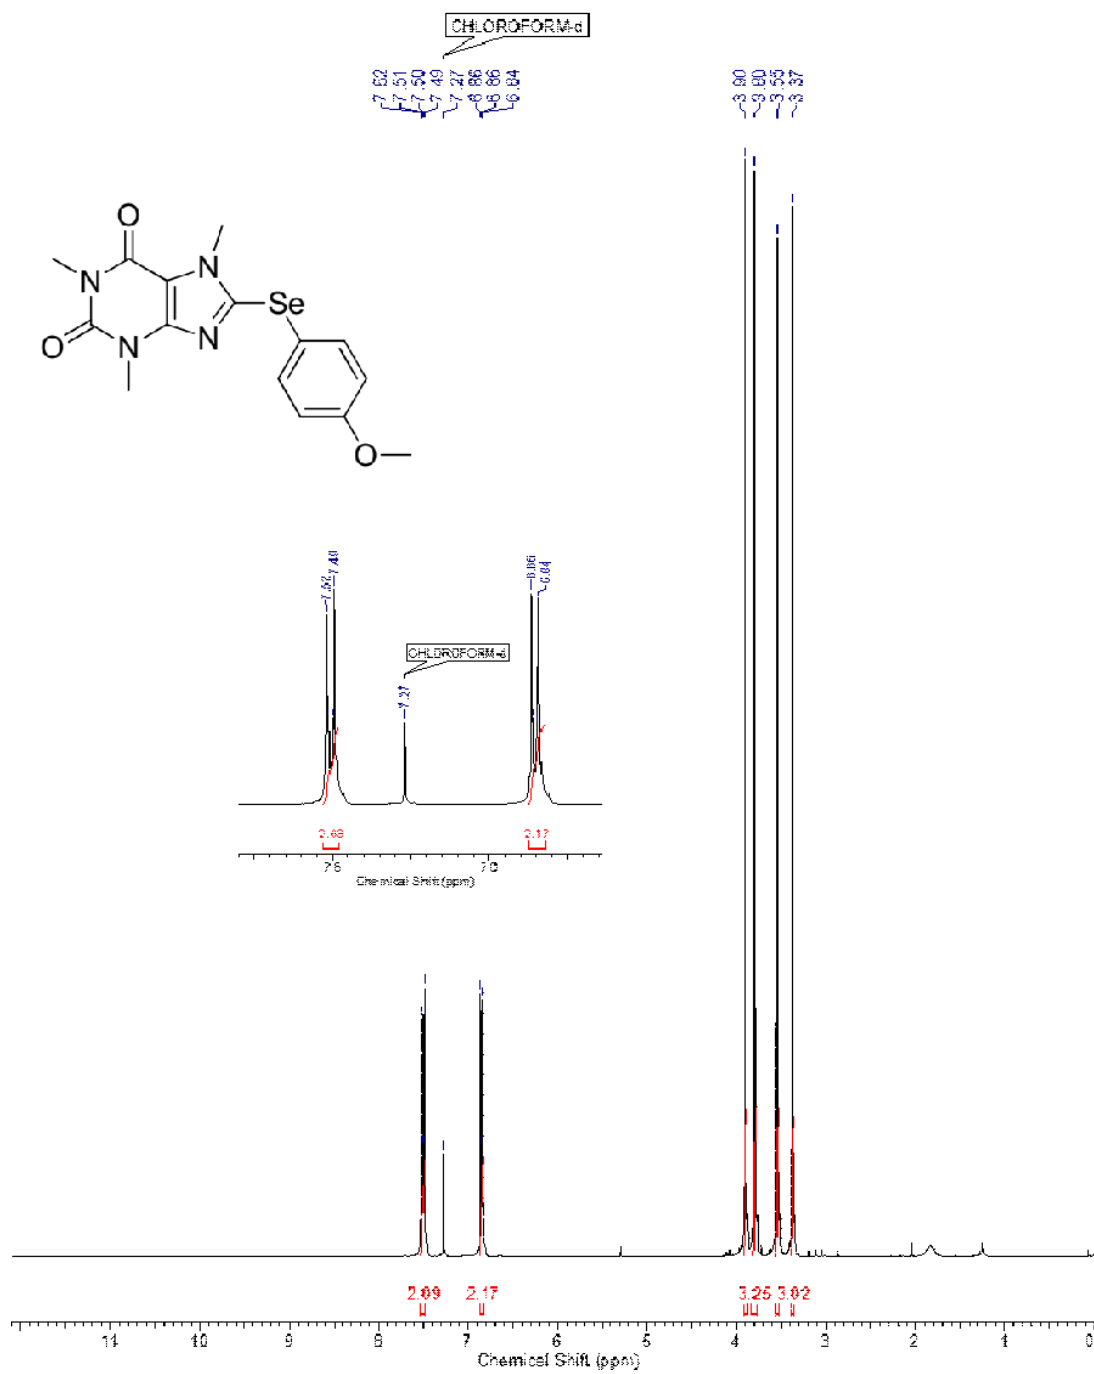

<sup>1</sup>H NMR (400 MHz, CDCl<sub>3</sub>) spectrum of **10**.

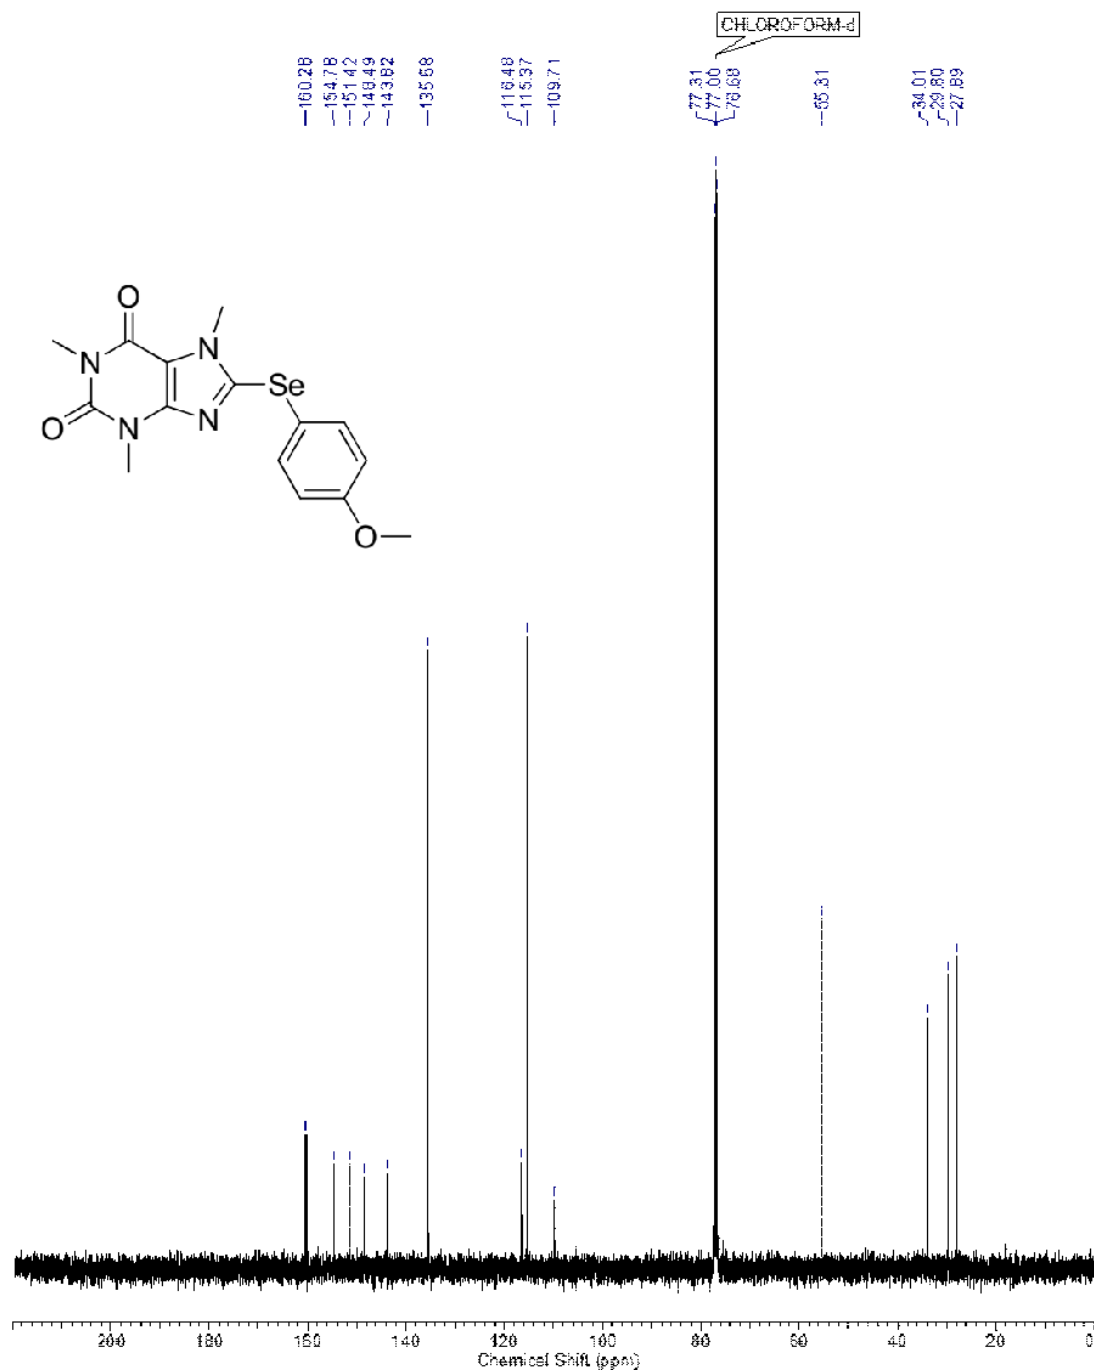

<sup>13</sup>C NMR (100 MHz, CDCl<sub>3</sub>) spectrum of **10**.

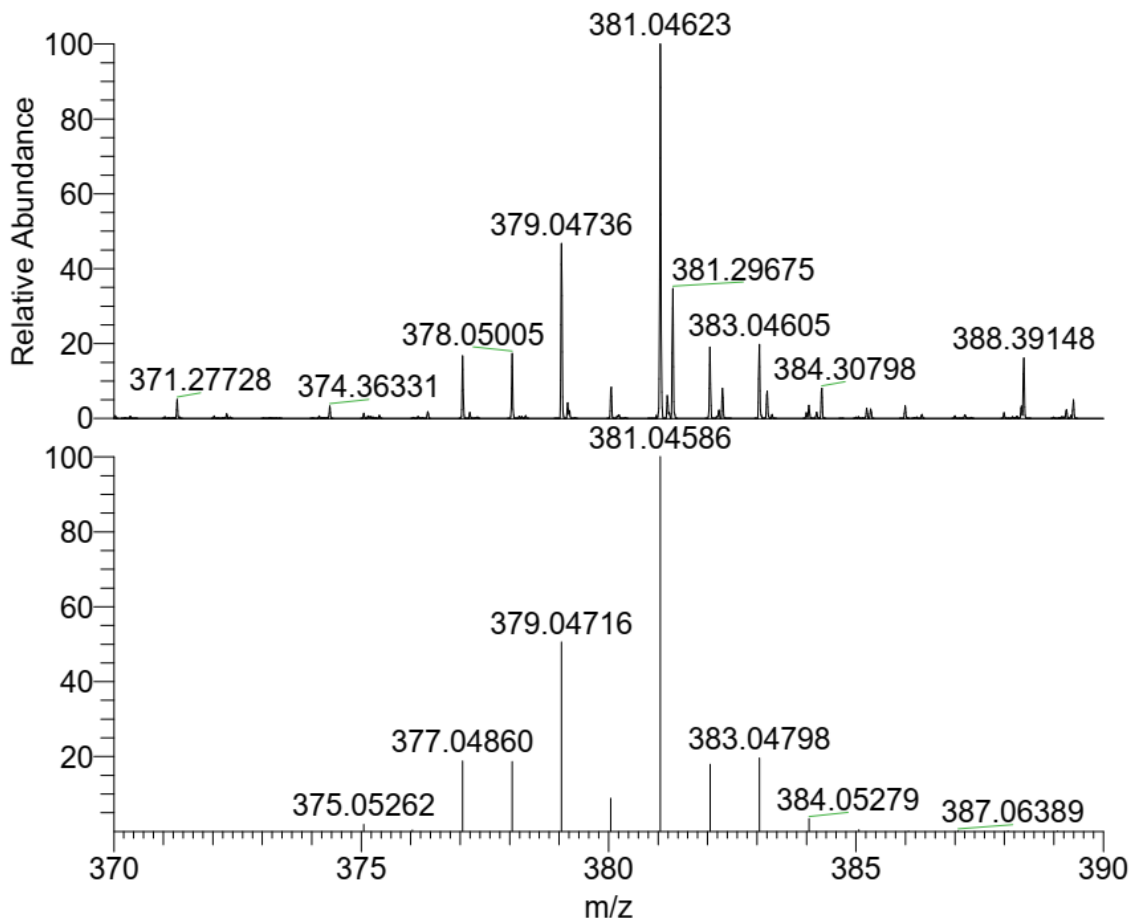

HRMS (ESI) - [M+H]<sup>+</sup> of 10

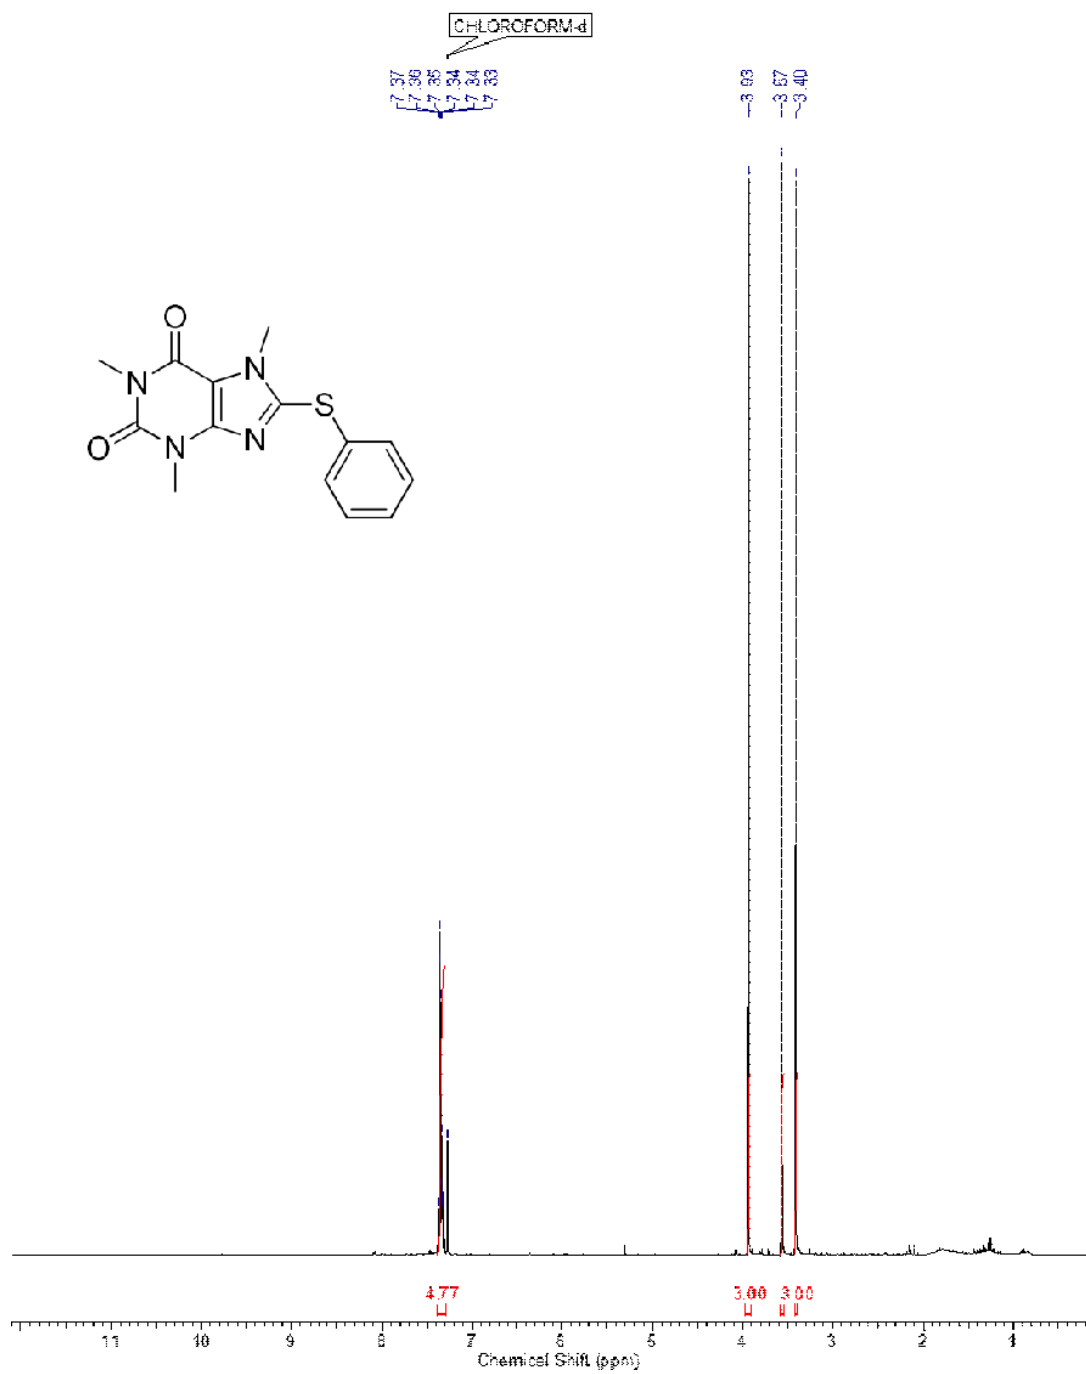

<sup>1</sup>H NMR (400 MHz, CDCl<sub>3</sub>) spectrum of **11**.

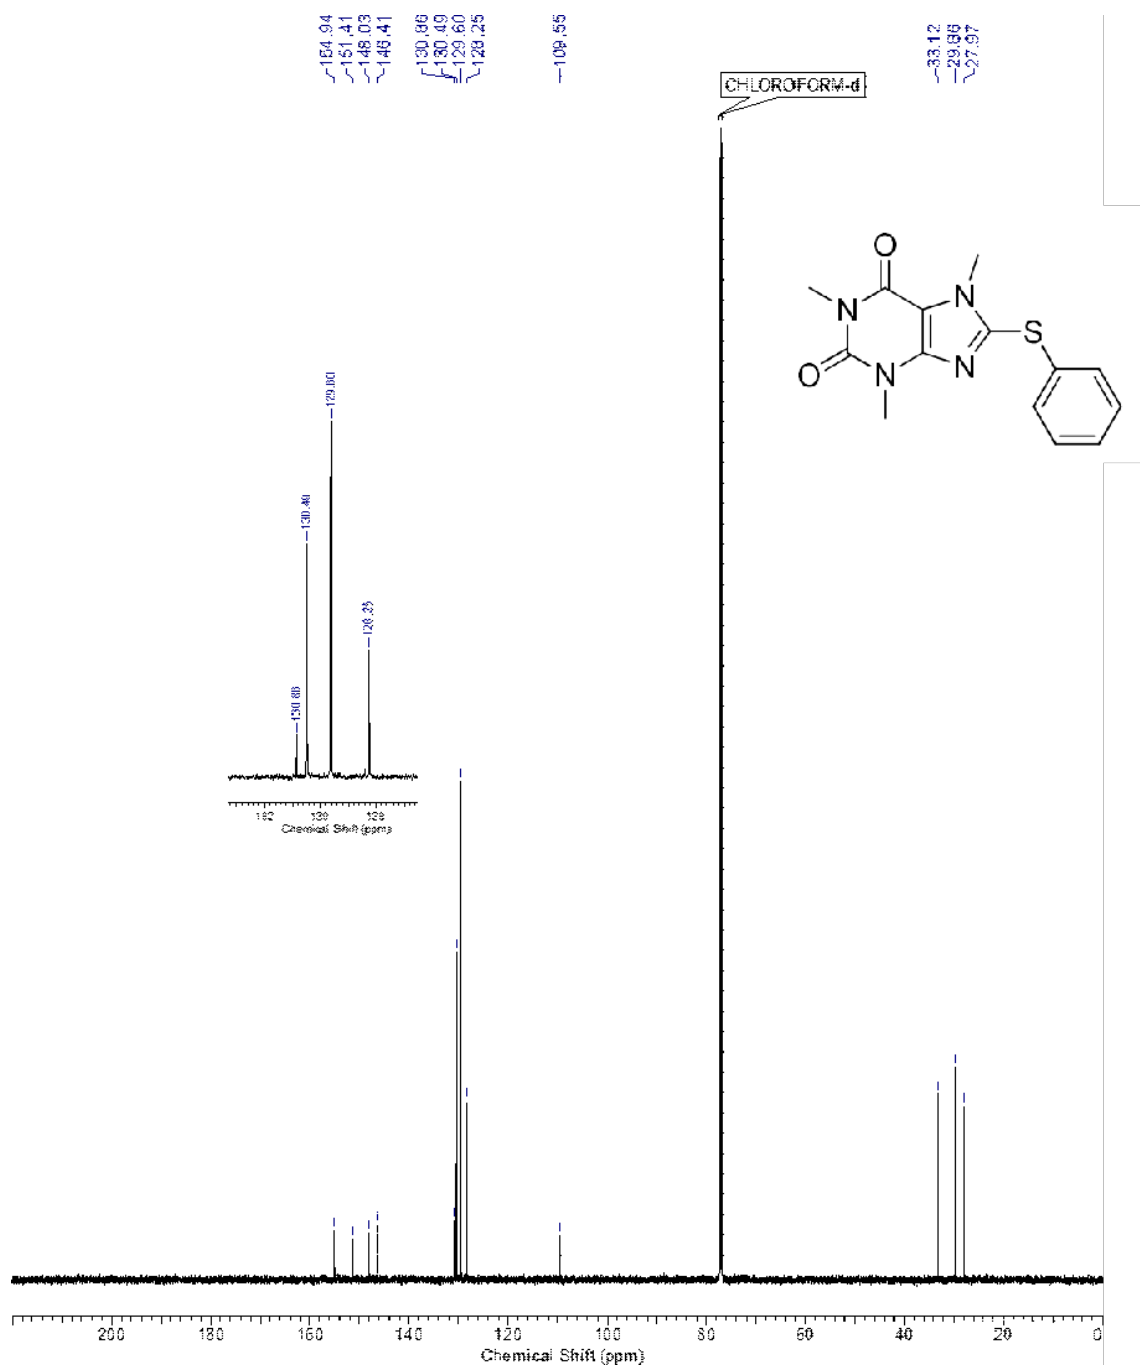

$^{13}\text{C}$  NMR (100 MHz,  $\text{CDCl}_3$ ) spectrum of 11.

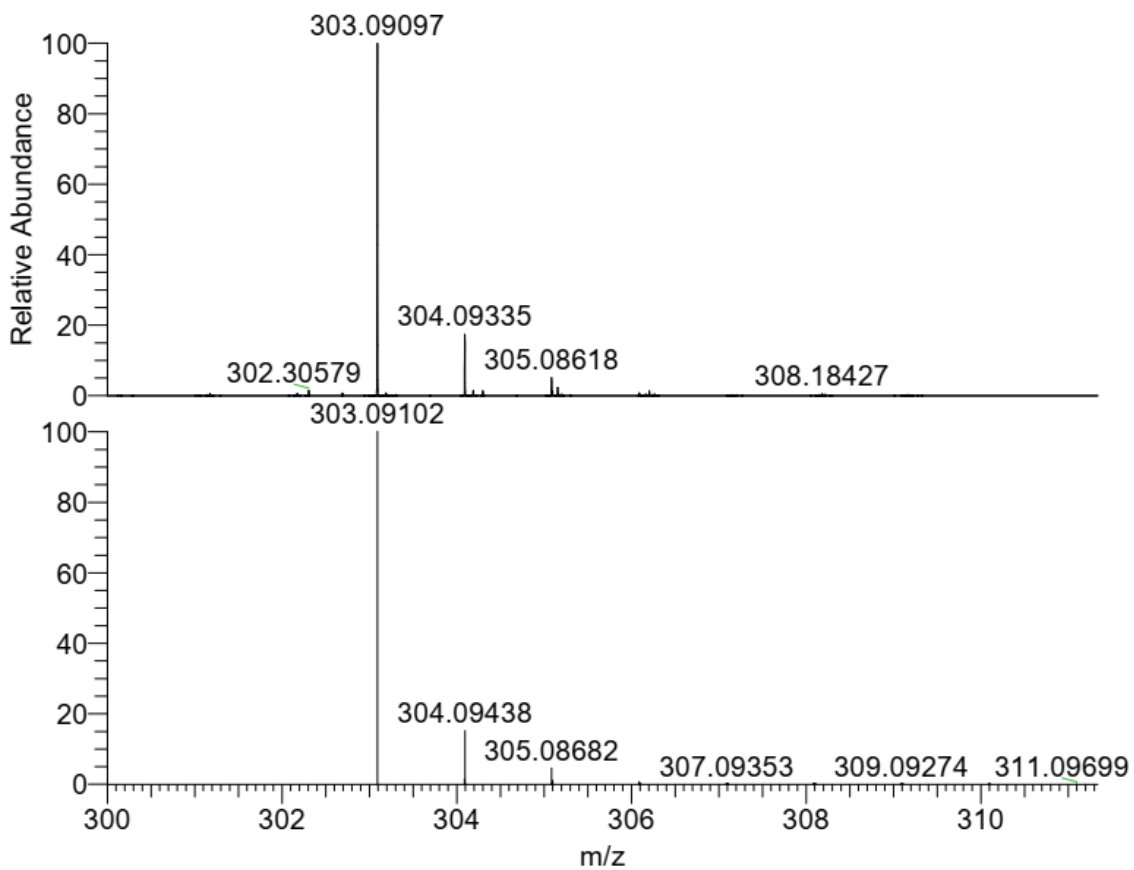

HRMS (ESI) -  $[M+H]^+$  of 11

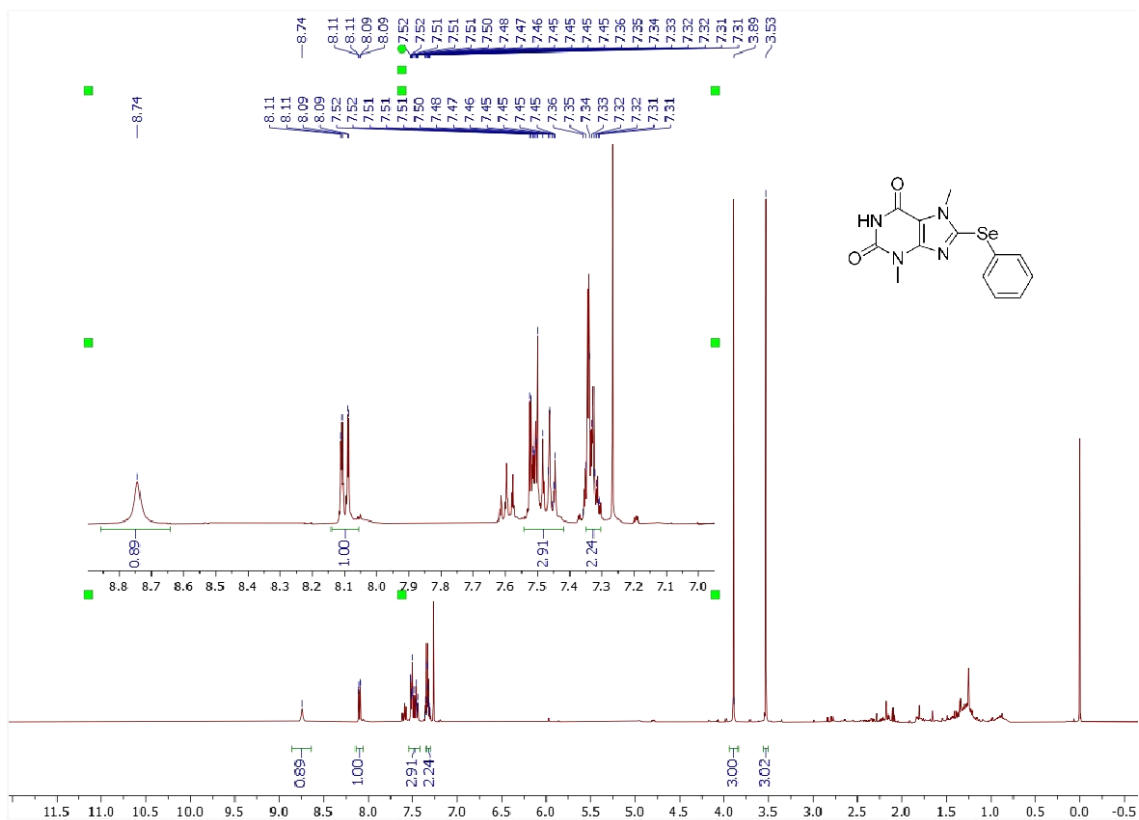

$^1\text{H}$  NMR (400 MHz,  $\text{CDCl}_3$ ) spectrum of **12**.

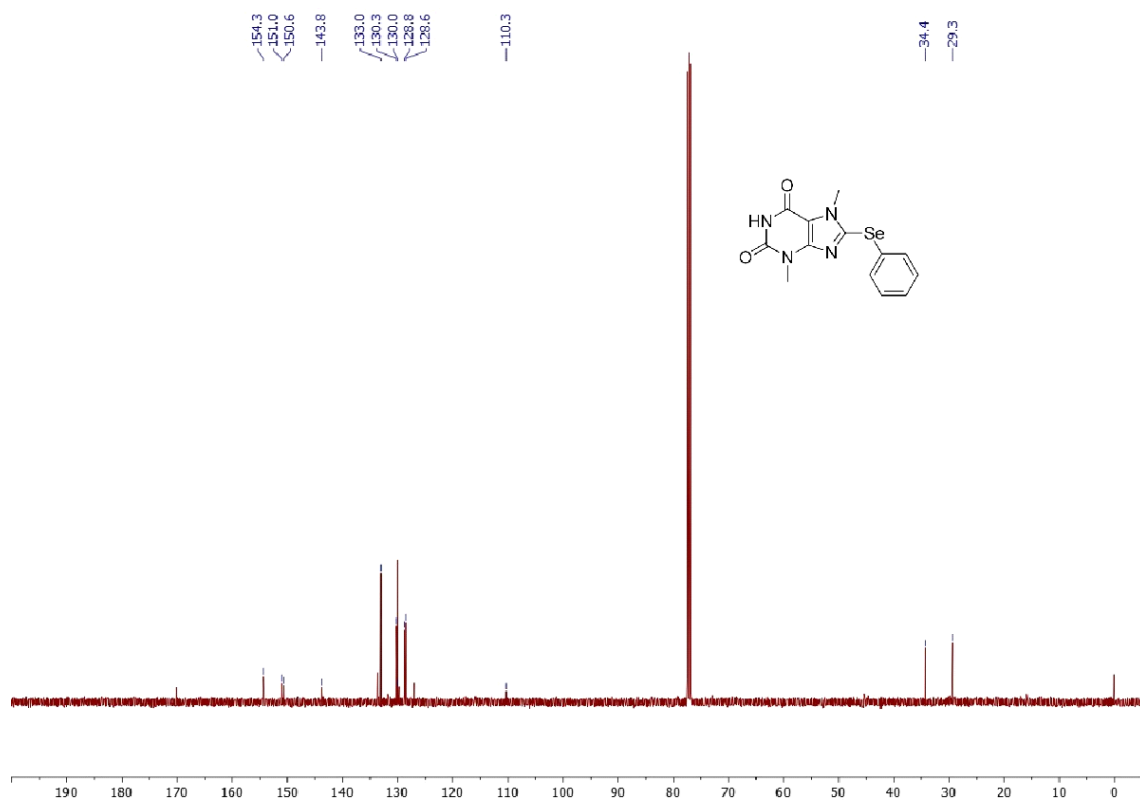

$^{13}\text{C}$  NMR (100 MHz,  $\text{CDCl}_3$ ) spectrum of **12**.

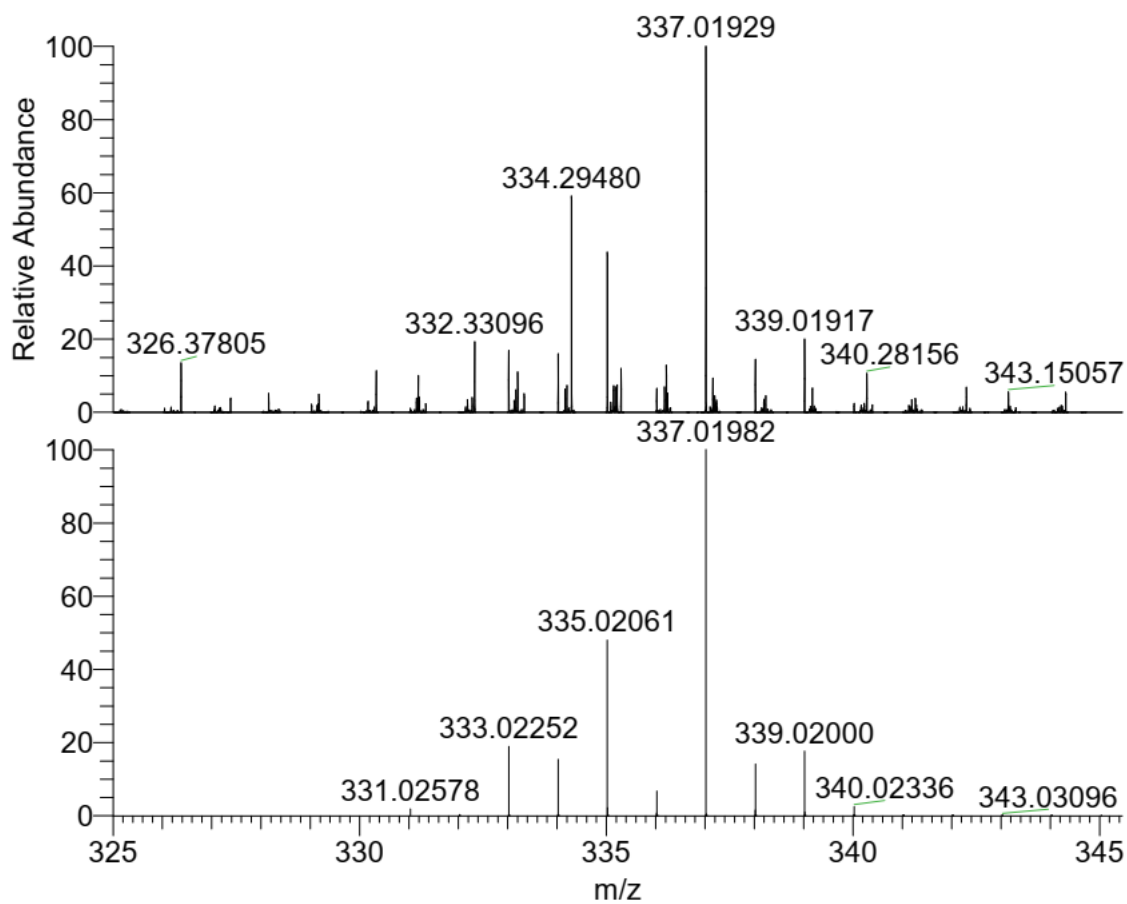

HRMS (ESI) - [M+H]<sup>+</sup> of 12

### 3. 1BNA Cross-docking

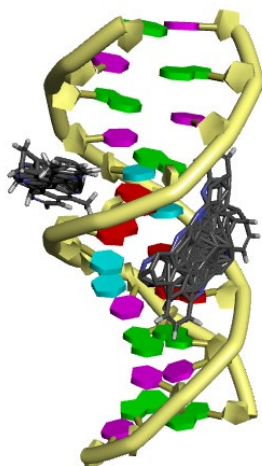

Cross-docking results obtained for crystallographic structure PDB ID: 1BNA with a classic DNA intercalation ligand ellipticine retrieve from crystallographic structure PDB ID: 1Z3F.
